# Stability and learning in excitatory synapses by nonlinear inhibitory plasticity

Christoph Miehl<sup>1,2</sup> and Julijana Gjorgjieva<sup>1,2</sup>

<sup>1</sup>Max Planck Institute for Brain Research, Frankfurt am Main, Germany; <sup>2</sup>Technical University of Munich, School of Life Sciences, Freising, Germany

Correspondence should be addressed to: [gjorgjieva@brain.mpg.de](mailto:gjorgjieva@brain.mpg.de)

## Abstract

Synaptic changes underlie learning and memory formation in the brain. But synaptic plasticity of excitatory synapses on its own is unstable, leading to unlimited growth of synaptic strengths without additional homeostatic mechanisms. To control excitatory synaptic strengths we propose a novel form of synaptic plasticity at inhibitory synapses. We identify two key features of inhibitory plasticity, dominance of inhibition over excitation and a nonlinear dependence on the firing rate of postsynaptic excitatory neurons whereby inhibitory synaptic strengths change in the same direction as excitatory synaptic strengths. We demonstrate that the stable synaptic strengths realized by this novel inhibitory plasticity achieve a fixed excitatory/inhibitory set-point in agreement with experimental results. Applying a disinhibitory signal can gate plasticity and lead to the generation of receptive fields and strong bidirectional connectivity in a recurrent network. Hence, a novel form of nonlinear inhibitory plasticity can simultaneously stabilize excitatory synaptic strengths and enable learning upon disinhibition.

## Introduction

Learning and memory formation in the brain are implemented by synaptic changes undergoing Hebbian plasticity whereby joint pre- and postsynaptic activity increase the strength of synaptic connections (Hebb, 1949; Abbott and Nelson, 2000). However, Hebbian long-term plasticity of excitatory synapses to other excitatory neurons, referred to as excitatory plasticity, is inherently unstable (Miller and MacKay, 1994). Increasing excitatory synaptic strengths leads to an increase in the firing rates of excitatory postsynaptic neurons which in turn further increases synaptic strengths. This positive feedback loop is called ‘Hebbian runaway dynamics’ (Turrigiano and Nelson, 2004). To counteract unstable synaptic growth and control resultant rate dynamics, some form of homeostatic control is needed. Experimental studies have uncovered multiple homeostatic mechanisms. One prominent mechanism is synaptic scaling, where synaptic connections onto a given excitatory neuron potentiate or depress, while preserving relative strengths, to maintain a target level of activity (Turrigiano et al., 1998; Turrigiano, 2008). An alternative mechanism that has gained much recent attention is heterosynaptic plasticity (Lynch et al., 1977; Chistiakova et al., 2015), which occurs both at excitatory and inhibitory synapses that have not been directly affected by the induction of plasticity (Field et al., 2020). A third plausible homeostatic mechanism with significant experimental evidence is intrinsic plasticity which affects the intrinsic excitability of single neurons by adjusting the distribution of different ion channel subtypes (Desai et al., 1999; Debanne et al., 2019).

Various computational studies have benefited from this plethora of experimental evidence for homeostatic control of firing rates and synaptic strengths, and implemented a range of computational models from purely phenomenological ones to detailed biophysical ones. Some relatively straightforward ways to stabilize firing rates and control synaptic strengths in models include imposing upper bounds on synaptic strengths, applying normalization schemes which adjust synaptic strengths by preserving the total sum of incoming weights into a neuron (Oja, 1982; Miller and MacKay, 1994) and assuming that the plasticity mechanism modifying synaptic strengths is

40 itself plastic – called ‘metaplasticity’ (Bienenstock et al., 1982; Yger and Gilson, 2015). These can often be linked to  
41 the above experimentally described homeostatic mechanisms. Computational studies have also begun to uncover  
42 the various, often complementary, functional roles of different homeostatic mechanisms, e.g. on synaptic scaling  
43 versus intrinsic plasticity (Wu et al., 2020) or heterosynaptic plasticity (Field et al., 2020). However, how exactly  
44 synaptic plasticity and homeostatic mechanisms interact to control synaptic strengths, and yet enable learning,  
45 is still unresolved (Fox and Stryker, 2017; Turrigiano, 2017; Yee et al., 2017). Part of the challenge is that the ex-  
46 perimentally measured timescales of homeostatic mechanisms are too slow to stabilize the Hebbian runaway  
47 dynamics in computational models, sometimes referred to as the ‘temporal paradox’ of homeostasis (Zenke et al.,  
48 2013, 2017; Zenke and Gerstner, 2017). A related problem to the integration of plasticity and homeostasis is the  
49 trade-off between stability and flexibility. While stimulus representations need to be stable, for instance to allow  
50 long-term memory storage, the system also needs to be flexible to allow re-learning of the same, or learning of  
51 new representations (Fusi, 2017).

52 Here, we investigate an under-explored mechanism to control and stabilize excitatory synaptic strengths and  
53 their dynamics, which is long-term plasticity of inhibitory-to-excitatory (I-to-E) synapses, referred to as inhibitory  
54 plasticity. Experimental paradigms have characterized diverse forms of inhibitory plasticity, usually via high-frequency  
55 stimulation (Caillard et al., 1999; Shew et al., 2000; Mellor, 2018) and via pairing of presynaptic and postsynaptic  
56 spikes (D’amour and Froemke, 2015; Hennequin et al., 2017). Inhibition has been shown to control the plasticity  
57 mechanisms regulating connection strengths between excitatory neurons depending on their firing rates (Steele  
58 and Mauk, 1999) as well as precise spike timing (Paille et al., 2013; Hiratani and Fukai, 2017; Herstel and Wierenga,  
59 2021). Inhibitory plasticity can even dictate the direction of excitatory plasticity, shifting between depression or po-  
60 tentiation (Wang and Maffei, 2014). Given this potential of inhibitory plasticity to affect so many different aspects  
61 of synaptic strength and firing rate dynamics in a network, it remains unclear what properties are important for  
62 achieving stability, while still enabling neural circuits to learn.

63 Using computational modeling, we characterize a novel mechanism of inhibitory plasticity with two key fea-  
64 tures. First, we propose that inhibitory plasticity should depend nonlinearly on the firing rate of an excitatory  
65 postsynaptic neuron to robustly control and stabilize the strengths of excitatory synaptic connections made by  
66 that neuron. This means that for low postsynaptic rates, I-to-E synapses should depress, for high postsynaptic  
67 rates I-to-E synapses should potentiate and without any postsynaptic activity undergo no plasticity. This nonlin-  
68 ear dependence of inhibitory plasticity on the postsynaptic firing rate is sufficient for stability, without the need  
69 for additional homeostatic mechanisms. Second, we require a dominance of inhibition, which can be reflected  
70 in the larger number of synaptic connections, faster synaptic dynamics or overall higher firing rates of inhibitory  
71 synapses and neurons relative to excitatory ones. Dominance of inhibition has already been demonstrated in  
72 circuits in the visual cortex which operate as inhibition-stabilized networks (ISNs) (Tsodyks et al., 1997; Sanzeni  
73 et al., 2020; Ahmadian and Miller, 2021). A direct consequence from our proposed novel mechanism of nonlinear  
74 inhibitory plasticity is the formation of a fixed ratio of excitatory to inhibitory synaptic strengths, in agreement  
75 with experimental data (D’amour and Froemke, 2015). Besides stability, our proposed inhibitory plasticity can also  
76 support flexible learning of receptive fields and recurrent network structures by gating excitatory plasticity via  
77 disinhibition (Froemke et al., 2007; Letzkus et al., 2011). Therefore, our results provide a plausible solution to the  
78 stability-flexibility problem by identifying key aspects of inhibitory plasticity, which provide experimentally testable  
79 predictions.

## 80 Results

### 81 **A linear inhibitory plasticity rule fails to robustly stabilize weight dynamics**

82 To investigate the plausibility of inhibitory plasticity as a control mechanism of excitatory synaptic strengths, we  
83 initially considered a model based on a feedforward inhibitory motif prominent in many brain circuits (Fig. 1A).  
84 Here, a population of presynaptic excitatory neurons projects to a population of inhibitory neurons and both  
85 populations project to a postsynaptic excitatory neuron. Such a motif could resemble, for instance, the excitatory  
86 input from the thalamus to excitatory and inhibitory neurons in a primary sensory cortical area (Tremblay et al.,  
87 2016). We described the activity of neurons by their firing rates, and investigated average population firing rates  
88 and synaptic strength changes as a function of synaptic plasticity (Methods). Experimental studies have shown

89 that the sign and magnitude of excitatory plasticity depends nonlinearly on the firing rates (Kirkwood et al., 1996;  
90 Philpot et al., 2003; Cooper and Bear, 2012). Inspired by these findings, we implemented plasticity of E-to-E synaptic  
91 connections  $w^{EE}$  (or weights) as a nonlinear function of the postsynaptic rate  $v^E$  (Fig. 1B):

$$\tau_w^E \dot{w}^{EE} = \rho^E v^E (v^E - c_{post}^E). \quad (1)$$

92 Here,  $\rho^E$  denotes the excitatory presynaptic rate and  $\tau_w^E$  is the timescale of excitatory plasticity. We refer to the  
93 postsynaptic rate at which the plasticity changes sign as the ‘postsynaptic LTD/LTP threshold’, denoted by  $c_{post}^E$ . If  
94 the firing rate  $v^E$  is smaller than the threshold  $c_{post}^E$ , then the change in synaptic strength is negative leading to  
95 long-term depression (LTD), while if  $v^E$  is larger than  $c_{post}^E$ , then the change in synaptic strength is positive leading  
96 to long-term potentiation (LTP) (Fig. 1B). This means that increasing the excitatory postsynaptic firing rate will lead  
97 to potentiation of excitatory weights, and in a positive feedback loop will further increase the neuron’s firing rate  
98 – known as the classical problem of ‘Hebbian runaway dynamics’.

99 Hence, we wanted to determine a plausible mechanism to counteract excitatory runaway dynamics. We pos-  
100 tulated that regulating the inhibitory input into the postsynaptic neuron provides an efficient way to stabilize ex-  
101 citatory weights and firing rates. In our framework, inhibitory neurons can affect excitatory plasticity in three  
102 equivalent ways. (1) The number of inhibitory synapses  $N^I$  onto the postsynaptic neuron can change, for example,  
103 through the growth or removal of synapses via structural plasticity. (2) The strength of I-to-E synapses  $w^{EI}$  can  
104 change via inhibitory plasticity. (3) Finally, the rate of inhibitory neurons  $v^I$  can also change through the exter-  
105 nal excitatory input to the inhibitory neurons  $\rho^I$  or the excitatory-to-inhibitory weight  $w^{IE}$ . Various experimental  
106 studies have revealed that the plasticity of I-to-E synapses can be induced via the stimulation of the relevant input  
107 pathways (Caillard et al., 1999; Shew et al., 2000; Wang and Maffei, 2014). Given this experimental evidence for the  
108 plasticity of I-to-E synapses, we examined the influence of changing the strength of I-to-E synapses,  $w^{EI}$ , on the  
109 strength and magnitude of E-to-E synapses,  $w^{EE}$  (Fig. 1C). We found that stronger  $w^{EI}$  weights rates require higher  
110 presynaptic excitatory rates to induce LTP, while weaker  $w^{EI}$  weights require lower presynaptic excitatory rates to  
111 induce LTP. This effectively leads to a shift of the threshold between LTD and LTP as a function of the presynap-  
112 tic excitatory firing rate as  $w^{EI}$  changes. We refer to the presynaptic excitatory firing rate at which the plasticity  
113 changes sign between potentiation and depression as the ‘presynaptic LTD/LTP threshold’, denoted by  $c_{pre}^E$  (Fig. 1C).  
114 In contrast to the fixed postsynaptic LTD/LTP threshold,  $c_{post}^E$  (Fig. 1B), this presynaptic LTD/LTP threshold depends,  
115 among others, on the strength of I-to-E synapses (Fig. 1C; Methods, Eq. 12).

116 Rather than hand-tuning the strength of I-to-E synapses, here we propose that a particular inhibitory plastic-  
117 ity rule can dynamically adjust their strength as a function of presynaptic inhibitory and postsynaptic excitatory  
118 activity. However, the exact form of this plasticity has not yet been mapped experimentally. Therefore, we first  
119 investigated an inhibitory plasticity rule widely-used in computational models which depends linearly on the post-  
120 synaptic rate  $v^E$  (Vogels et al., 2011; Clopath et al., 2016) (Fig. 1D,  $\dot{w}^{EI}$ ):

$$\tau_w^I \dot{w}^{EI} = v^I (v^E - c_{post}^I). \quad (2)$$

121 Here,  $\tau_w^I$  denotes the timescale of inhibitory plasticity. As for excitatory plasticity, we refer to the postsynaptic rate  
122 at which inhibitory plasticity changes from LTD to LTP as the ‘inhibitory postsynaptic LTD/LTP threshold’, denoted  
123 by  $c_{post}^I$ . This threshold determined the ‘target rate’ of the postsynaptic neuron (Vogels et al., 2011). If the excitatory  
124 postsynaptic neuron fires at higher rates than  $c_{post}^I$ , inhibitory LTP leads to a decrease of its firing rate, while if  
125 the neuron fires at lower rates than  $c_{post}^I$ , inhibitory LTD increases its rate. To prevent an unstable scenario where  
126 excitatory (Eq. 1) and inhibitory plasticity (Eq. 2) push the postsynaptic excitatory neuron towards two different  
127 firing rates, here we assume that the excitatory and inhibitory thresholds are matched (Fig. 1D,  $c_{post}^E = c_{post}^I$ ).

128 To investigate the effect of this ‘linear inhibitory plasticity’ mechanism on the temporal evolution of excitatory  
129 and inhibitory synaptic weights,  $w^{EE}$  and  $w^{EI}$ , we plotted the flow field in the phase plane  $w^{EI}$  vs.  $w^{EE}$  (Fig. 1E). We  
130 found that the interaction of excitatory and inhibitory plasticity generates a line of stable fixed points (i.e. a line  
131 attractor) where both synaptic weights do not change any more (Fig. 1E, black solid line; see Methods). The initial  
132 weights determine whether the weights ultimately converge to the line attractor and stabilize. When the initial  
133 E-to-E weights  $w^{EE}$  are much larger than the initial I-to-E weights  $w^{EI}$  (Fig. 1E, below the dashed line), the weights  
134 become unstable (Fig. 1E, F). Equivalently, the weights become unstable when the postsynaptic rate  $v^E$  is beyond

135 the crossover point of the excitatory and inhibitory plasticity curves as a function of the postsynaptic excitatory  
 136 rate (Fig. 1D, black cross). For firing rates beyond this crossover point, the E-to-E weights increase faster than the  
 137 I-to-E weights, leading to runaway dynamics.

138 In summary, our results suggest that a well-known form of inhibitory plasticity with a linear dependence on the  
 139 postsynaptic excitatory firing rate can control excitatory weight changes only for a range of initial conditions. There  
 140 exists a whole range of initial conditions (specifically where the E-to-E are larger than the I-to-E weights) where the  
 141 postsynaptic excitatory firing rate is sufficiently large and where the weight dynamics explode. This scenario could  
 142 be problematic if during normal development in the animal, the E-to-E and I-to-E weights are set up in this range,  
 143 and implies the need for careful tuning to prevent unlimited weight growth.

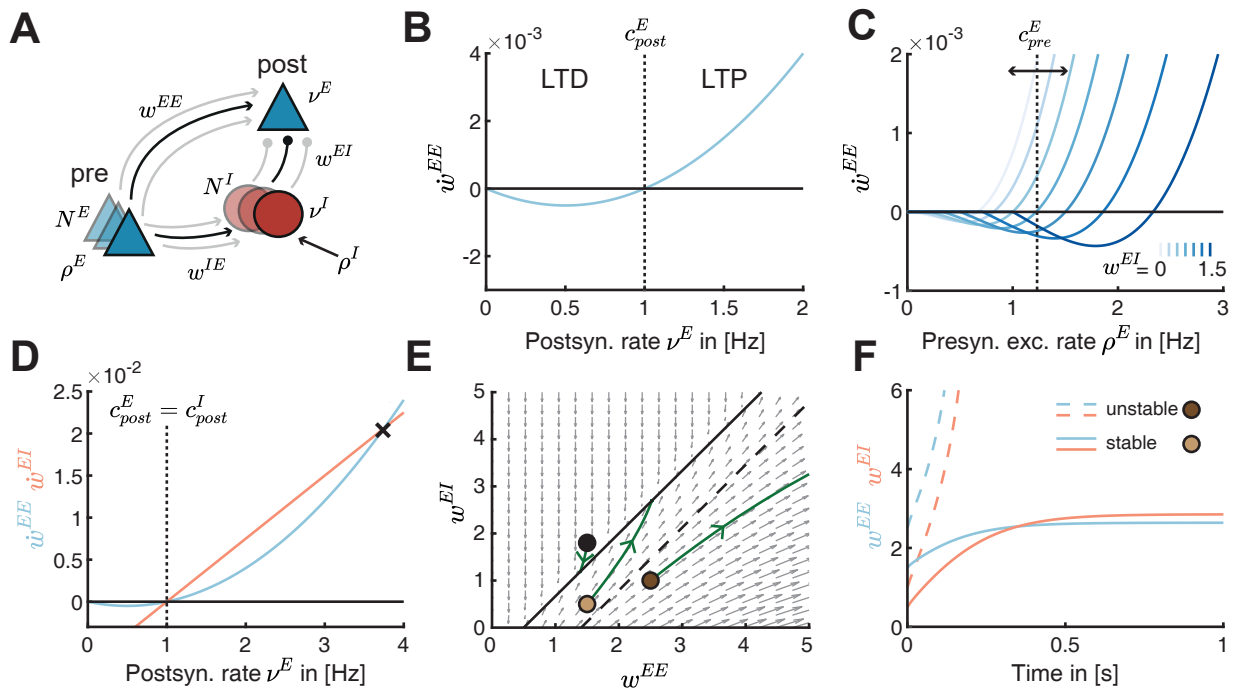

**Figure 1. Linear inhibitory plasticity fails to stabilize weights for high excitatory firing rates.** **A.** Schematic of a feedforward inhibitory motif. A single postsynaptic excitatory neuron with rate  $\nu^E$  receives input from an excitatory presynaptic population with number of synapses  $N^E$ , firing rate  $\rho^E$  and weight  $w^{EE}$  and an inhibitory neuron population with number of synapses  $N^I$ , firing rate  $\nu^I$  and weight  $w^{EI}$ . The inhibitory population receives external excitatory input with rate  $\rho^I$  and input from the presynaptic excitatory population via  $w^{IE}$ . **B.** Plasticity curve of E-to-E weights ( $\dot{w}^{EE}$ , blue) as a function of the postsynaptic rate  $\nu^E$ . The postsynaptic LTD/LTP threshold  $c_{post}^E$  is set to 1 Hz. **C.** E-to-E weight change ( $\dot{w}^{EE}$ ) as a function of the presynaptic excitatory rate  $\rho^E$  for different I-to-E weights  $w^{EI}$  ranging from 0 to 1.5. The presynaptic LTD/LTP threshold  $c_{pre}^E$  is shown for  $w^{EI} = 0.75$  (vertical dashed line). **D.** Plasticity curves of E-to-E ( $\dot{w}^{EE}$ , blue) and I-to-E ( $\dot{w}^{EI}$ , red) weights as a function of the postsynaptic rate  $\nu^E$ . The excitatory and inhibitory LTD/LTP thresholds are identical ( $c_{post}^E = c_{post}^I$ ). Black cross marks crossover of the plasticity curves at which weight dynamics become unstable. **E.** Phase portrait of the dynamics of E-to-E ( $w^{EE}$ ) and I-to-E ( $w^{EI}$ ) weights in the phase plane. Grey arrows indicate the sign of weight evolution over time, points represent three different weight initializations,  $[w_0^{EE}, w_0^{EI}] = \{[1.5, 1.8], [1.5, 0.5], [2.5, 1]\}$ , and green lines represent the weight evolution for each case. The two colored points represent initial weights in F. Black line indicates the line attractor and the dashed line separates stable from unstable initial conditions (Methods, Eq. 19). **F.** E-to-E ( $w^{EE}$ , blue) and I-to-E ( $w^{EI}$ , red) weights as a function of time for stable (solid lines,  $[w_0^{EE}, w_0^{EI}] = [1.5, 0.5]$ ) and unstable (dashed lines,  $[w_0^{EE}, w_0^{EI}] = [2.5, 1]$ ) initial conditions.

#### 144 **A novel nonlinear inhibitory plasticity rule as a robust mechanism to stabilize excitatory weights**

145 To ensure weight stability without fine tuning of the initial E-to-E and I-to-E weights, we proposed a novel inhibitory  
 146 plasticity rule. The rule depends nonlinearly on the postsynaptic rate  $\nu^E$ , similarly to excitatory plasticity (Eq. 1,  
 147 Fig. 2A):

$$\tau_w^I \dot{w}^{EI} = \nu^I \nu^E (\nu^E - c_{post}^I). \quad (3)$$

148 As before, to prevent a scenario where the two, excitatory and inhibitory, plasticity rules push the postsynaptic  
 149 excitatory neuron towards two different firing rates, we assume here that the excitatory and inhibitory thresholds  
 150 are matched  $c_{post}^E = c_{post}^I$ . However, as we show later, this assumption can be relaxed. Differently from the linear  
 151 inhibitory plasticity rule (Eq. 2), the nonlinear inhibitory plasticity rule ensures that I-to-E synapses do not change  
 152 in the case where the postsynaptic firing rate is zero (Fig. 2B, beyond grey line), as suggested experimentally (Wang  
 153 and Maffei, 2014). Additionally, the nonlinear rule eliminates the region of initial weight configurations in the phase  
 154 space where the weights grow out of bound; instead the weights converge to the line attractor (Fig. 2B). Indeed,  
 155 the E-to-E weights, I-to-E weights and the postsynaptic rate reach a stable configuration over time (Fig. 2C). We  
 156 calculated the condition leading to stable weight dynamics (Methods, Eq. 13-16) as a function of the excitatory  
 157 and inhibitory input rates ( $v^I, \rho^E$ ), the number of synapses ( $N^E, N^I$ ) and the timescale of the plasticity mechanisms  
 158 ( $\tau_w^E, \tau_w^I$ ):

$$\frac{N^I (v^I)^2}{\tau_w^I} > \frac{N^E (\rho^E)^2}{\tau_w^E}. \quad (4)$$

159 This condition ensures stable weight dynamics whenever inhibition is more ‘dominant’ than excitation, either by  
 160 having more inhibitory synapses ( $N^I$ ), higher inhibitory rate ( $v^I$ ), a faster timescale of inhibitory plasticity ( $\tau_w^I$ ) or a  
 161 combination thereof. From now on, we assume a faster timescale of inhibitory relative to excitatory plasticity (see  
 162 Table 1). An alternative way to achieve stability involves a feedback connection from the postsynaptic neuron to  
 163 the inhibitory population (Suppl. Fig. S1A). In this case, sufficiently strong E-to-I feedforward and feedback weights  
 164 guarantee stability in the presence of this feedback inhibitory motif (Suppl. Fig. S1B-D).

165 We found that the line attractor depends on several model parameters (see Methods, Eq. 13) (Fig. 2D)

$$w^{EI} = \frac{N^E \rho^E}{N^I v^I} w^{EE} - \frac{c_{post}}{N^I v^I}. \quad (5)$$

166 Under the assumption that the LTD/LTP thresholds of excitatory and inhibitory plasticity are the same,  $c_{post} = c_{post}^E =$   
 167  $c_{post}^I$ , we found that the slope of the line attractor can be written as  $N^E \rho^E / (N^I v^I)$ , while the intersection of the line  
 168 attractor with the abscissa can be written as  $c_{post} / (N^E \rho^E)$ . Therefore, by changing any of the network parameters  
 169 we can predict the stable configuration to which the weights will converge.

170 Taken together, we have proposed a novel form of nonlinear inhibitory plasticity which can counteract exci-  
 171 tatory runaway weight dynamics without the need for fine tuning. The proposed rule eliminates the need for  
 172 additional homeostatic mechanisms and upper bounds on the weights to stabilize weight dynamics. Our model-  
 173 ing approach allows us to dissect the exact dependencies of the stability condition on number of synapses, firing  
 174 rates and plasticity timescales of excitatory and inhibitory neurons.

## 175 **Dynamic matching of the excitatory and inhibitory postsynaptic thresholds between LTD and** 176 **LTP**

177 What happens if the postsynaptic thresholds between LTD and LTP for excitatory and inhibitory synapses are not  
 178 identical, as might be the case in most biological circuits (Fig. 3A)? We found that this leads to the disappearance  
 179 of the line attractor (see Methods Eq. 13). When the excitatory postsynaptic threshold is lower than the inhibitory  
 180 postsynaptic threshold ( $c_{post}^E < c_{post}^I$ ), both E-to-E and I-to-E weights grow unbounded (Fig. 3B). E-to-E weights cannot  
 181 stabilize as they continue to potentiate ( $\dot{w}^{EE} > 0$ ) even though the postsynaptic neuron is controlled by the fast  
 182 inhibitory plasticity and approaches the target rate  $v^E = c_{post}^I$  (Fig. 3C). Therefore, stability of firing rates does not  
 183 imply stability of synaptic weights, especially in the case when the postsynaptic thresholds between LTD and LTP  
 184 are non-equal. In the case of  $c_{post}^E > c_{post}^I$ , E-to-E and I-to-E weights steadily decrease.

185 Motivated by experimental findings and theoretical considerations (Keck et al., 2017), we proposed that these  
 186 thresholds can be dynamically regulated in opposite directions (Fig. 3D; see Methods). When the postsynaptic  
 187 rate is lower than the excitatory postsynaptic LTD/LTP threshold ( $v^E < c_{post}^E$ ), the excitatory postsynaptic LTD/LTP  
 188 threshold should decrease, while when the postsynaptic rate is higher than the threshold ( $v^E > c_{post}^E$ ), the excitatory  
 189 threshold should increase. Similarly, when the postsynaptic rate is higher than the inhibitory postsynaptic LTD/LTP  
 190 threshold ( $v^E > c_{post}^I$ ), the inhibitory postsynaptic LTD/LTP threshold should decrease, while when the postsynaptic  
 191 rate is lower than the threshold ( $v^E < c_{post}^I$ ), the inhibitory threshold should increase. Eventually, these dynamic lead  
 192 to matching excitatory and inhibitory LTD/LTP thresholds (Fig. 3E). Therefore, the rate and weight dynamics can

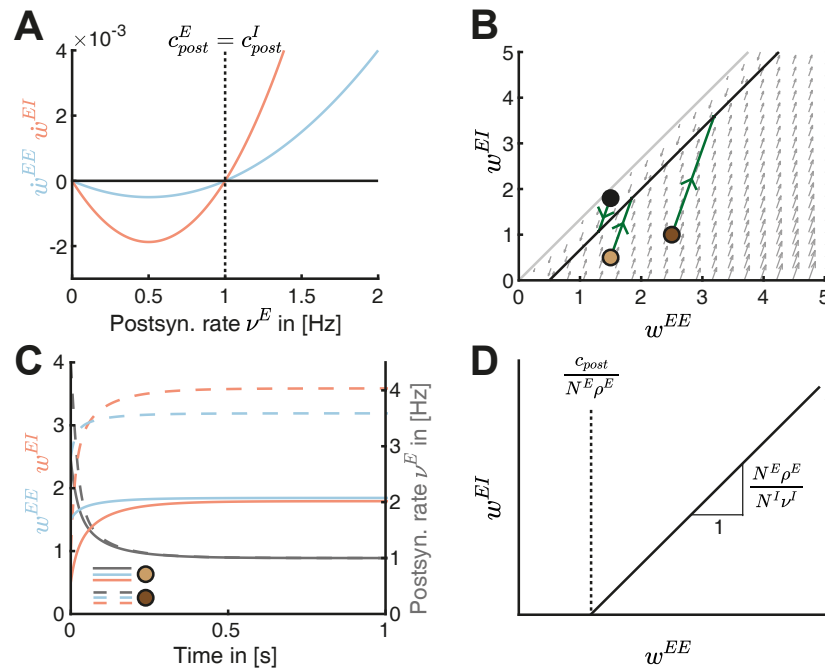

**Figure 2. A novel nonlinear inhibitory plasticity rule can counteract runaway dynamics of excitatory-to-excitatory weights.** **A.** Plasticity curves of E-to-E ( $\dot{w}^{EE}$ , blue) and I-to-E ( $\dot{w}^{EI}$ , red) weights as a function of the postsynaptic rate  $\nu^E$ . The excitatory and inhibitory LTD/LTP thresholds are identical ( $c_{post}^E = c_{post}^I$ ). **B.** Phase portrait of the dynamics of E-to-E ( $w^{EE}$ ) and I-to-E ( $w^{EI}$ ) weights in the phase plane. Grey arrows indicate the direction of weight evolution over time, points represent three different initial conditions of the weights,  $[w_0^{EE}, w_0^{EI}] = \{[1.5, 1.8], [1.5, 0.5], [2.5, 1]\}$ , and green lines represent the weight evolution for each initial condition. The two colored points represent initial weights in C. Black line indicates the line attractor and the grey line separates the space at which the postsynaptic firing rate is zero (no dynamics) or larger than zero (Methods, Eq. 17). **C.** E-to-E ( $w^{EE}$ , blue) and I-to-E ( $w^{EI}$ , red) weight dynamics and postsynaptic rate dynamics ( $\nu^E$ , grey) as a function of time for two initial conditions in B,  $[w_0^{EE}, w_0^{EI}] = \{[1.5, 0.5], [2.5, 1]\}$ . **D.** The slope and intersection of the line attractor with the abscissa (black line) depend on the number and firing rates of excitatory and inhibitory neurons and the LTD/LTP threshold.

193 both be simultaneously stabilized (Fig. 3F). Implementing this dynamic threshold adjustment process generates  
 194 different postsynaptic LTD/LTP threshold configurations (Fig. 3E) and postsynaptic rates (Fig. 3F, grey lines). The  
 195 generation of such heterogeneous postsynaptic rates is consistent with experimental observations in multiple  
 196 brain regions (Buzsáki and Mizuseki, 2014).

### 197 The nonlinear inhibitory plasticity rule can regulate the network response to perturbations

198 Since even if they are unequal, excitatory and inhibitory LTD/LTP thresholds can be dynamically matched, from now  
 199 on we assumed that they are equal and static. Next, we wanted to investigate how the new nonlinear inhibitory  
 200 plasticity rule adjusts the network response following a perturbation. Inspired by sensory deprivation experiments  
 201 (Kirkwood et al., 1996; Philpot et al., 2003; Kuo and Dringenberg, 2009) or direct stimulation of input pathways  
 202 (Huang et al., 1992; Abraham, 2008), we investigated the network response to perturbing the excitatory presynaptic  
 203 input rate (Fig. 4A).

204 Independent of the direction of the perturbation, we found that the novel inhibitory plasticity rule brings the  
 205 excitatory postsynaptic rate back to the target rate (Fig. 4B). The inhibitory rate  $\nu^I$  also readjusts because the in-  
 206 hibitory population receives input from the perturbed excitatory population. But the new inhibitory rate is different  
 207 than the rate before the perturbation (Fig. 4B). We found that a perturbation which decreases the excitatory input  
 208 rate, leads to the depression of both type of weights  $w^{EE}$  and  $w^{EI}$ ; in contrast, a perturbation which increases the  
 209 excitatory input rate leads to their potentiation (Fig. 4C). The response to these perturbations is consistent with  
 210 previous experimental results. For example, it has been shown that input perturbations via sensory deprivation  
 211 decrease inhibitory activity (Hengen et al., 2013; Kuhlman et al., 2013; Barnes et al., 2015). Specifically, sensory de-  
 212 privation has been shown to depress inhibitory synaptic strengths, decrease in the number of inhibitory synapses

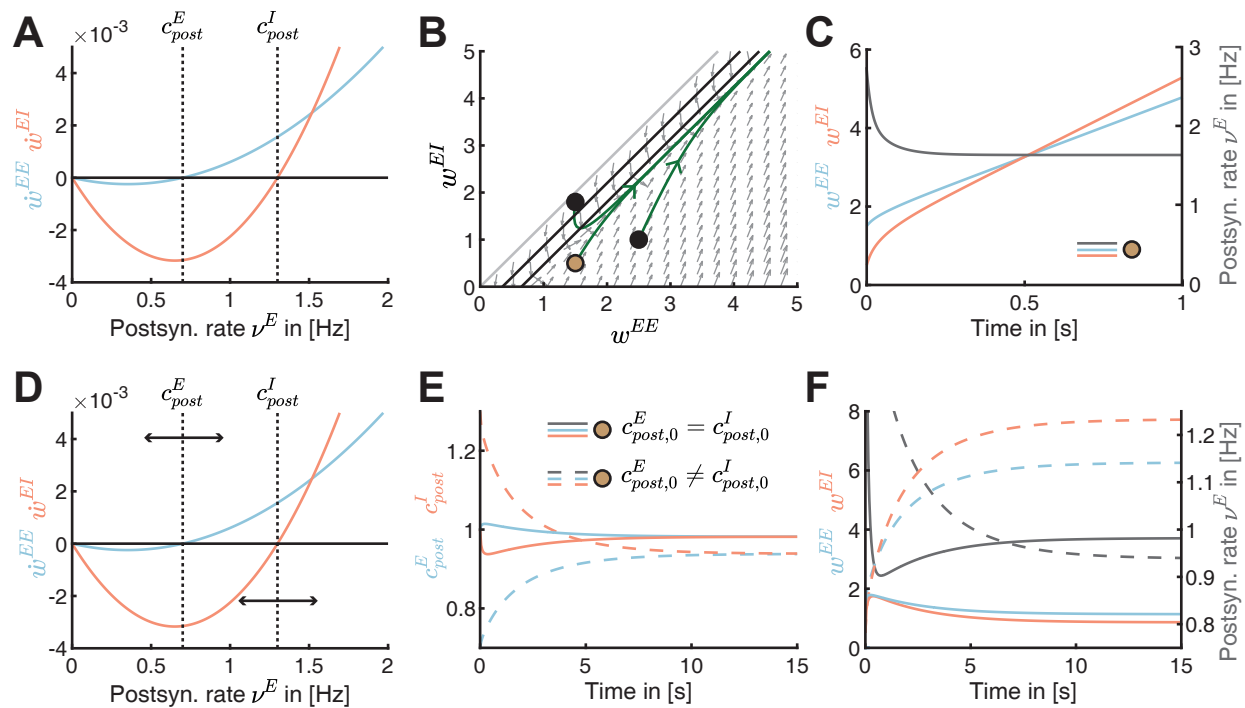

**Figure 3. Dynamic matching of the excitatory and inhibitory postsynaptic LTD/LTP thresholds.** **A.** Plasticity curves of E-to-E ( $\dot{w}^{EE}$ , blue) and I-to-E ( $\dot{w}^{EI}$ , red) weights as a function of the postsynaptic rate  $\nu^E$  with static, non-identical LTD/LTP thresholds ( $c_{post}^E = 0.7$ ,  $c_{post}^I = 1.3$ ). **B.** Phase portrait of the dynamics of E-to-E ( $w^{EE}$ ) and I-to-E ( $w^{EI}$ ) weights in the phase plane for the scenario with static thresholds in A. Grey arrows indicate the direction of weight evolution over time, points represent three different initial conditions of the weights,  $[w_0^{EE}, w_0^{EI}] = \{[1.5, 1.8], [1.5, 0.5], [2.5, 1]\}$ , and green lines represent the weight evolution for each initial condition. The colored point represents initial weight in C and E-F. Black lines indicate the nullclines and the grey line separates the space at which the postsynaptic firing rate is zero (no dynamics) or larger than zero (Methods, Eq. 17). **C.** Excitatory ( $w^{EE}$ , blue) and inhibitory ( $w^{EI}$ , red) weight dynamics and postsynaptic rate dynamics ( $\nu^E$ , grey) for one initial condition in B,  $[w_0^{EE}, w_0^{EI}] = [1.5, 0.5]$ . The thresholds are static as in A. **D.** Postsynaptic LTD/LTP thresholds  $c_{post}^E$  and  $c_{post}^I$  shift dynamically depending on recent postsynaptic rate  $\nu^E$ . For lower postsynaptic rate than the excitatory postsynaptic LTD/LTP threshold ( $\nu^E < c_{post}^E$ ),  $c_{post}^E$  decreases, and for  $\nu^E > c_{post}^E$ ,  $c_{post}^E$  increases. For higher postsynaptic rate than the inhibitory postsynaptic LTD/LTP threshold ( $\nu^E > c_{post}^I$ ),  $c_{post}^I$  decreases, and for  $\nu^E < c_{post}^I$ ,  $c_{post}^I$  increases (see Methods). **E.** Evolution of excitatory ( $c_{post}^E$ , blue) or inhibitory ( $c_{post}^I$ , red) postsynaptic LTD/LTP thresholds for two different initial conditions ( $c_{post,0}^E = c_{post,0}^I$ , full lines and  $c_{post,0}^E = 0.7$ ,  $c_{post,0}^I = 1.3$ , dashed lines). Same initial weight condition as in C,  $[w_0^{EE}, w_0^{EI}] = [1.5, 0.5]$ , but for dynamic thresholds shown in D. **F.** Excitatory ( $w^{EE}$ , blue) and inhibitory ( $w^{EI}$ , red) weight dynamics and postsynaptic rate dynamics ( $\nu^E$ , grey) for two different initial conditions ( $c_{post,0}^E = c_{post,0}^I$ , full lines and  $c_{post,0}^E = 0.7$ ,  $c_{post,0}^I = 1.3$ , dashed lines). Same initial weight condition as in C,  $[w_0^{EE}, w_0^{EI}] = [1.5, 0.5]$ , but for dynamic thresholds shown in D. See E for the legend.

213 (Chen et al., 2011; Keck et al., 2011; Chen et al., 2012; van Versendaal et al., 2012; Li et al., 2014) (but see (Maffei  
 214 et al., 2006, 2010)) and depress excitatory synaptic strengths (Allen et al., 2003; Miska et al., 2018). At the same  
 215 time, up-regulating activity has been shown to potentiate I-to-E synapses (Lourenço et al., 2014; Xue et al., 2014).  
 216 Our framework can even predict the steady values of the E-to-E and I-to-E synaptic weights, as well as their ratio, by  
 217 calculating the line attractor in the phase space of  $w^{EE}$  and  $w^{EI}$  weights as a function of the perturbed parameter  
 218 (Fig. 4D).

219 Interestingly, we observed that this adjustment occurs by modulation of the presynaptic threshold between LTD  
 220 and LTP for both excitatory and inhibitory plasticity. Decreasing the excitatory input rate decreases the excitatory  
 221 presynaptic LTD/LTP threshold, hence limiting the range of presynaptic firing rates that generate depression. In  
 222 contrast, we found that increasing the excitatory input rate increases the LTD/LTP threshold (Fig. 4E). Such a shift in  
 223 the plasticity threshold for excitatory synapses has been measured in sensory deprivation experiments (Kirkwood  
 224 et al., 1996; Philpot et al., 2003; Kuo and Dringenberg, 2009), and while restoring vision after sensory deprivation  
 225 (Philpot et al., 2003; Cooper and Bear, 2012). Similarly to excitatory plasticity, perturbations in the excitatory input  
 226 rate also shift the presynaptic threshold between LTD and LTP for inhibitory plasticity (Fig. 4F). Since there is no

227 experimental evidence for this effect, we propose it as a prediction for the shift between LTD and LTP for I-to-E  
 228 weights ( $w^{EI}$ ) in the presence of these perturbations.

229 In summary, our nonlinear inhibitory plasticity can adjust the network response and synaptic strengths to  
 230 excitatory input rate perturbations, similar to experimental findings. We predict that this shift occurs by modulating  
 231 the presynaptic LTD/LTP thresholds for both excitatory and inhibitory plasticity.

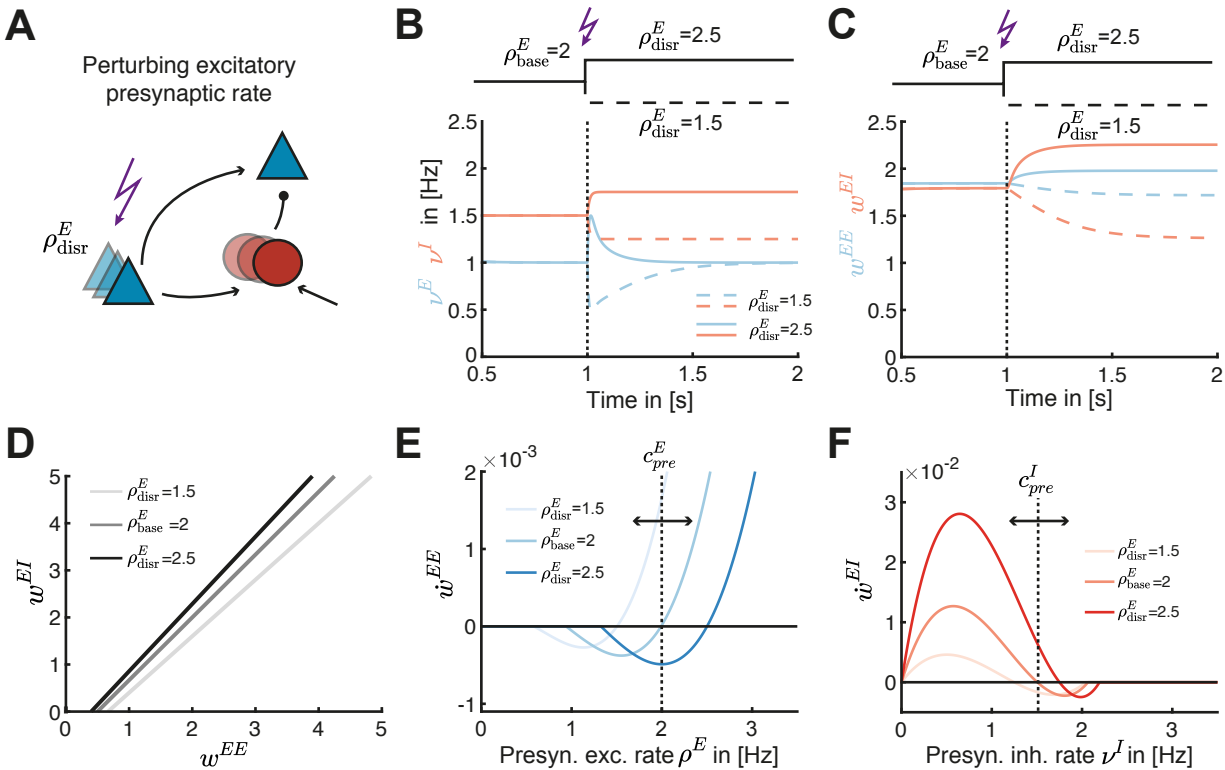

**Figure 4. Nonlinear inhibitory plasticity can regulate the network response to perturbations.** **A.** Schematic of perturbing the excitatory presynaptic rate in the inhibitory feedforward motif. **B.** Effect of increasing (solid lines,  $\rho_{\text{disr}}^E = 2.5$  Hz) or decreasing (dashed lines,  $\rho_{\text{disr}}^E = 1.5$  Hz) excitatory input rates from a baseline of  $\rho_{\text{base}}^E = 2$  Hz on excitatory (blue) and inhibitory (red) firing rates. **C.** Same as B but for the  $w^{EE}$  and  $w^{EI}$  weights. **D.** The line attractor for the baseline input  $\rho_{\text{base}}^E$  and two input perturbations  $\rho_{\text{disr}}^E$ . **E.** E-to-E weight change  $\dot{w}^{EE}$  as a function of the presynaptic excitatory rate  $\rho^E$  for the baseline input  $\rho_{\text{base}}^E$  and for two input perturbations  $\rho_{\text{disr}}^E$ . **F.** I-to-E weight change  $\dot{w}^{EI}$  as a function of the inhibitory rate  $\nu^I$  for the baseline input  $\rho_{\text{base}}^E$  and for two input perturbations  $\rho_{\text{disr}}^E$ .

### 232 The nonlinear inhibitory plasticity rule establishes a fixed excitatory to inhibitory weight ratio

233 We next wanted to investigate plausible functional roles of the newly proposed nonlinear inhibitory plasticity be-  
 234 sides controlling excitatory and inhibitory firing rates and weights. Given our ability to calculate the steady states  
 235 of the weights (Fig. 4D), we studied the ratio of E-to-E and I-to-E weights:

$$R^{E/I} = \frac{w^{EE}}{w^{EI}} = \frac{N^I \nu^I w^{EI} + c_{\text{post}}}{N^E \rho^E w^{EI}} \quad (6)$$

236 (Methods). For strong I-to-E weights  $w^{EI}$ , the E/I ratio approximates to  $R_{\infty}^{E/I} = \frac{N^I \nu^I}{N^E \rho^E}$  (Fig. 5A, inset; see Methods).  
 237 Therefore, the E/I ratio is mainly determined by the ratio of excitatory and inhibitory input rates and the number  
 238 of synapses. Paradoxically, the E/I ratio decreases as the presynaptic excitatory rate  $\rho^E$  increases (Fig. 5A; Eq. 6).  
 239 This can be explained by considering that a higher excitatory input rate  $\rho^E$  generates more excitatory LTP (Fig. 1C),  
 240 which needs to be counteracted by even more inhibitory LTP to stabilize the weights. Analytically, this corresponds  
 241 to a line attractor with a steeper slope (Fig. 2D and Fig. 4D for increasing  $\rho^E$ ).



242 Inspired by experiments (D'amour and Froemke, 2015), we evaluated the E/I ratio  $R^{E/I}$  before and after inducing  
 243 excitatory and inhibitory plasticity for multiple initial weight configurations (Fig. 5B,C; Methods). As predicted ana-  
 244 lytically (Fig. 5A), the E/I ratio after plasticity induction in these simulations approaches the set-point  $R_{\infty}^{E/I}$  (Fig. 5C),  
 245 matching experiments (D'amour and Froemke, 2015). E/I ratios far from the set-point before plasticity induction  
 246 show the most drastic changes, with high postsynaptic firing rates resulting from dominant excitation needing  
 247 to be overcome by fast and drastic weight changes by nonlinear inhibitory plasticity. Indeed, we observed that  
 248 the I-to-E weights exhibit more change than E-to-E weights (Fig. 5D) in agreement with experiments (D'amour and  
 249 Froemke, 2015). This suggests that nonlinear inhibitory plasticity plays a more prominent role than excitatory plas-  
 250 ticity in establishing a fixed E/I ratio (Fig. 5E,F). With the linear inhibitory plasticity rule (Vogels et al., 2011), a fixed  
 251 E/I ratio is only reached for initial weights which ultimately converge to the line attractor (Fig. 1E).

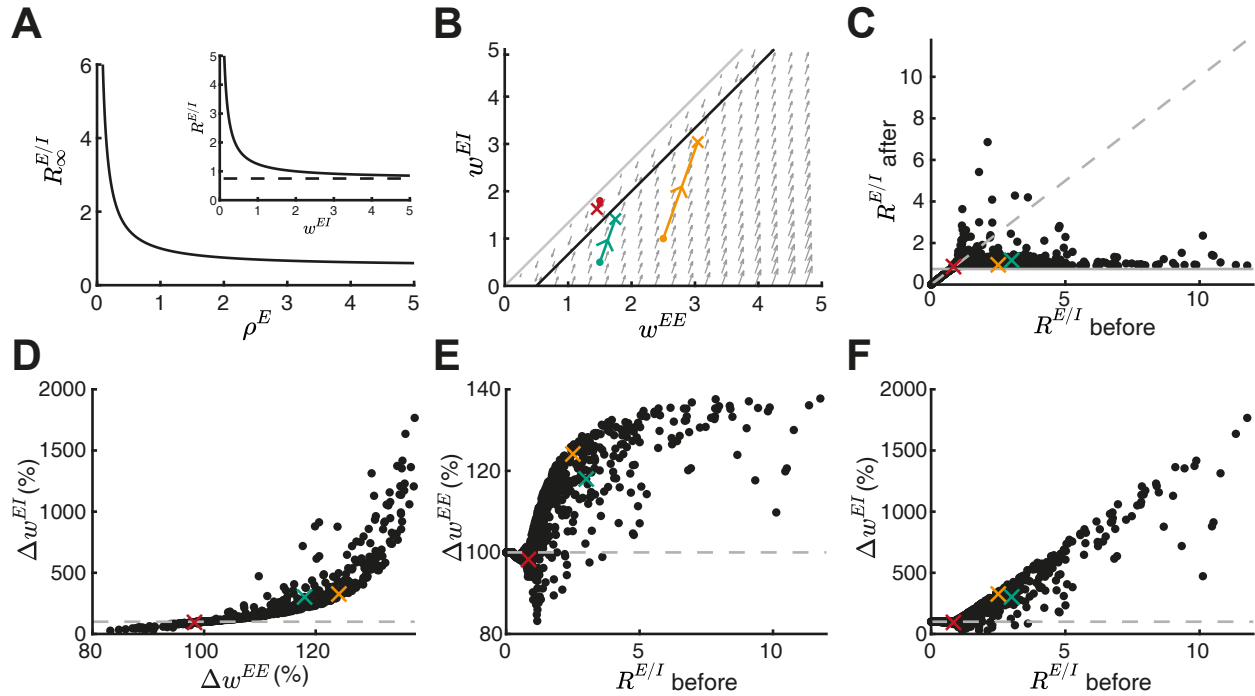

**Figure 5. The nonlinear inhibitory plasticity rule keeps a fixed excitatory to inhibitory weight ratio.** **A.** The steady state E/I weight ratio  $R_{\infty}^{E/I}$  as a function of the presynaptic excitatory rate  $\rho^E$ . Inset:  $R^{E/I}$  approaches the steady state  $N^I v^I / (N^E \rho^E)$  (dashed line) for large I-to-E weights. **B-F** Based on a random initial weight configuration drawn from a uniform distribution in the range of  $[0, 3]$ , excitatory and inhibitory plasticity was induced for 100 ms. Extreme initial E/I ratios ( $R^{E/I}$  before  $> 12$ ) were excluded from the analysis. **B.** Phase portrait of the dynamics of E-to-E ( $w^{EE}$ ) and I-to-E ( $w^{EI}$ ) weights in the phase plane. Grey arrows indicate the direction of weight evolution over time, colored points represent three different weight initialization,  $[w_0^{EE}, w_0^{EI}] = \{[1.5, 1.8], [1.5, 0.5], [2.5, 1]\}$ , colored lines represents the weight evolution for each case and the cross marks the weights after plasticity induction. **C.** E/I ratio before and after plasticity induction. Crosses indicate examples in B. Grey dashed line indicates the identity line and grey line indicates  $R_{\infty}^{E/I}$ . **D.** E-to-E weight change  $\Delta w^{EE}$  versus I-to-E weight change  $\Delta w^{EI}$  after plasticity induction in percent of initial synaptic weights. Dashed grey line indicates initial I-to-E weight strength and crosses indicate examples in B. **E.** E-to-E weight change  $\Delta w^{EE}$  as a function of E/I ratio  $R^{E/I}$  before plasticity in percent of initial weights. Dashed grey line indicates initial E-to-E weight strength and crosses indicate examples in B. **F.** Same as E but for I-to-E weight change  $\Delta w^{EI}$ .

## 252 Gating of receptive field formation via a disinhibitory signal

253 What functional implications does the proposed nonlinear inhibitory plasticity rule have on setting up network  
 254 circuitry? Other than controlling excitatory and inhibitory rates and weights, here we wanted to examine if the  
 255 nonlinear inhibitory plasticity rule can also enable flexible learning. Various forms of synaptic plasticity have been  
 256 observed to support receptive field formation and generate selectivity to stimulus features in the developing cortex  
 257 (Thompson et al., 2017). To investigate the function of interacting excitatory and inhibitory plasticity at the network

258 level, we first extended the feedforward circuit motif to two independent pathways with pathway-specific inhibition  
259 (Fig. 6A). We found that perturbing the presynaptic excitatory rate of both inputs in opposite directions, decreasing  
260 for input 1 and increasing for input 2, differently shifts the input-specific excitatory presynaptic LTD/LTP thresholds  
261 and establishes different E/I ratios (Fig. 6B), both in agreement with experimental studies (Huang et al., 1992;  
262 Abraham and Bear, 1996). These results suggest that the control of E-to-E weight dynamics via nonlinear inhibitory  
263 plasticity is input-specific.

264 Applying disinhibition by inhibiting the inhibitory population is a widely considered mechanism to ‘gate’ learning  
265 and plasticity (Froemke et al., 2007; Letzkus et al., 2011; Kuhlman et al., 2013). To test the potential of the circuit  
266 with nonlinear inhibitory plasticity to learn, we applied a disinhibitory signal by decreasing the external excitatory  
267 input onto the inhibitory populations. We found that this decreases the inhibitory input onto the postsynaptic  
268 neuron and potentiates E-to-E synapses,  $w^{EE}$  (Fig. 6C,  $\rho^I < 1$ ). In contrast, increasing the input onto the inhibitory  
269 populations depresses E-to-E synapses (Fig. 6C,  $\rho^I > 1$ ). Therefore, disinhibition via perturbation of the inhibitory  
270 neurons has the capacity to induce plasticity at E-to-E synapses and can gate excitatory plasticity.

271 How do the current results generalize to larger circuits with multiple independent inputs? In addition to pathway-  
272 specific inhibition, in this extended circuit we also introduced an unspecific inhibitory population (Fig. 6D). We pre-  
273 sented different inputs to each pathway, corresponding to oriented bars in the visual cortex, or different single  
274 tone frequencies in the auditory cortex (Methods). We found that disinhibiting the unspecific inhibitory popula-  
275 tion does not selectively potentiate E-to-E weights, and hence does not generate competition among the different  
276 inputs. In contrast, disinhibiting all ten specific inhibitory populations strongly increases the E-to-E weights corre-  
277 sponding to only a subset of inputs, a process also called receptive field formation (Fig. 6E). This happens because  
278 the plasticity from the inhibitory population specific to the input stimulated at a given time counteracts any in-  
279 creases in the E-to-E weights from the same input. Hence, when the specific inhibitory population is inhibited, the  
280 increase of E-to-E weights is mostly balanced by unspecific I-to-E weights, leading to stimulus-specific differences  
281 in excitatory and inhibitory inputs and therefore to competition.

282 Finally, we implemented a network of 30 recurrently connected excitatory neurons where each neuron receives  
283 inputs from multiple inputs and an unspecific and a specific inhibitory population (Fig. 6F). In addition to the feed-  
284 forward excitatory and inhibitory synapses, all recurrent E-to-E weights are also plastic. Similar as with a single  
285 postsynaptic neuron, we found that each of the excitatory neurons in the recurrent circuit forms a receptive field  
286 by becoming selective to one of the inputs (Fig. 6F, left; number next to the neuron). In addition, strong bidirec-  
287 tional connections form among recurrent excitatory neurons with similar receptive fields due to their correlated  
288 activity (Fig. 6F). This is consistent with strong bidirectional connectivity described in multiple experimental studies  
289 (Ko et al., 2011, 2013; Miller et al., 2014).

290 In summary, the newly proposed nonlinear inhibitory plasticity rule does not only ensure for stable synaptic  
291 weights and activity, but also enables the formation of feedforward and recurrent structures upon disinhibition  
292 which gates synaptic plasticity.

## 293 Discussion

294 Hebbian excitatory synaptic plasticity is inherently unstable, requiring additional homeostatic mechanisms to con-  
295 trol and stabilize excitatory-to-excitatory weight dynamics (Turrigiano and Nelson, 2004). Here, we proposed a  
296 novel form of inhibitory plasticity (Fig. 2), which can control excitatory and inhibitory firing rates and synaptic  
297 weights and enable stable and flexible learning of receptive fields in circuit models of the sensory cortex. We iden-  
298 tified the dominance of inhibition over excitation (Eq. 4) and identical postsynaptic thresholds between LTD and  
299 LTP for excitatory and inhibitory plasticity as two key features for stabilization of weight dynamics in our model  
300 (compare Fig. 2A and Fig. 3A-C). However, the latter requirement can be relaxed with a suitable dynamic mech-  
301 anism that enables self-adjusting of the plasticity thresholds in opposite directions for excitatory and inhibitory  
302 plasticity (Fig. 3D-F). This novel form of nonlinear inhibitory plasticity can also regulate the network response to  
303 perturbations of excitatory input rates (Fig. 4). A direct consequence of our inhibitory plasticity is the establish-  
304 ment of an E/I weight ratio set-point (Eq. 6), in agreement with experiments (D’amour and Froemke, 2015) (Fig. 5).  
305 Besides stability, the proposed form of inhibitory plasticity enables receptive field formation following disinhibition  
306 to input-specific inhibitory populations and in recurrent networks supports the formation of strong bidirectional

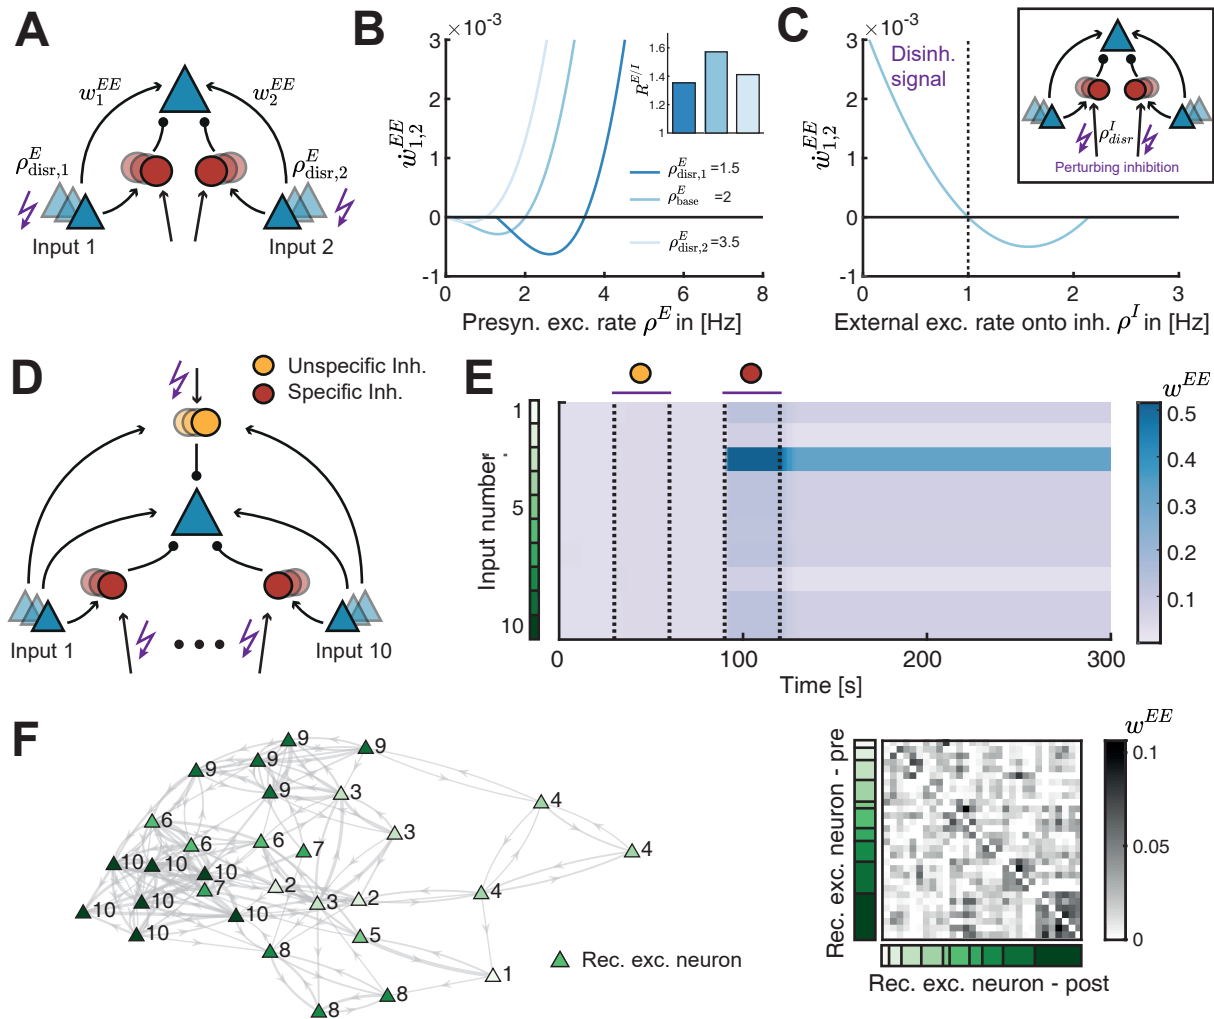

**Figure 6. Gating of receptive field formation via a disinhibitory signal.** **A.** Two independent inputs onto the same postsynaptic excitatory neuron. We perturb the presynaptic excitatory rate from input 1 or 2 ( $\rho_{disr,1,2}^E$ ). **B.** Plasticity curve of E-to-E weights for input 1 or 2 ( $\dot{w}_{1,2}^{EE}$ ) as a function of the presynaptic excitatory rate  $\rho^E$  for different input-specific perturbations  $\rho_{disr,1,2}^E$ . Inset: E/I weight ratio  $R^{E/I}$  for different input-specific perturbations. **C.** Plasticity curve of E-to-E weights for input 1 and 2 ( $\dot{w}_{1,2}^{EE}$ ) as a function of the external excitatory rate onto the inhibitory neurons  $\rho^I$ , corresponding to a perturbation  $\rho_{disr}^I$  of the inhibitory populations. Perturbing  $\rho^I$  below 1 Hz (dashed line) is interpreted as a disinhibitory signal. Inset: We perturb the external excitatory rate onto the inhibitory neurons  $\rho_{disr}^I$ . **D.** Ten independent inputs onto the same postsynaptic excitatory neuron with one inhibitory population unspecific to the input (yellow) and ten inhibitory populations each specific to one input (red). **E.** Evolution of excitatory weights over time. Purple bars indicate the time window for which disinhibition of either the unspecific (yellow) or all specific (red) inhibitory populations is applied (Methods). Input number color coded in green. **F.** Left: Network connectivity of recurrently connected excitatory neurons (triangles) after application of the disinhibitory signal. The number and the color indicates the input to which each neuron formed a receptive field (10 inputs in total). The thickness of the connection indicates the strength, only weights above 0.03 are shown. Right: Ordered recurrent E-to-E connectivity matrix. Input number color coded in green as in panel E.

307 connectivity among neurons with similar receptive fields (Fig. 6), suggesting a possible solution for the stability-  
 308 flexibility problem.

### 309 Inhibitory plasticity as a control mechanism of excitatory-to-excitatory weight dynamics

310 In the last decades, experimental studies have uncovered multiple possible mechanisms to counteract Hebbian  
 311 runaway dynamics, including synaptic scaling (Turrigiano et al., 1998; Turrigiano, 2011), heterosynaptic plasticity  
 312 (Lynch et al., 1977; Chistiakova et al., 2015), and intrinsic plasticity (Desai et al., 1999; Debanne et al., 2019). At the

313 same time, computational studies have included multiple homeostatic mechanisms to stabilize rates and weight  
314 dynamics, including upper bounds on the E-to-E weights, normalization mechanisms (Oja, 1982; Miller and MacKay,  
315 1994), and metaplastic changes of the plasticity function (Bienenstock et al., 1982; Yger and Gilson, 2015). However,  
316 the spatial and temporal scales for integrating Hebbian and homeostatic plasticity have remained an open question  
317 (Turrigiano, 2017; Zenke et al., 2017; Zenke and Gerstner, 2017).

318 In our study, we proposed a novel inhibitory plasticity rule at inhibitory-to-excitatory synapses which depends  
319 nonlinearly on the postsynaptic firing rate as a solution to the temporal paradox. While nonlinear excitatory plas-  
320 ticity rules have been identified in experimental studies (Kirkwood et al., 1996; Philpot et al., 2003; Cooper and  
321 Bear, 2012), less data is available for inhibitory plasticity. For example, presynaptic stimulation (hyperpolarization)  
322 and postsynaptic depolarization, have been shown to be required for inhibitory plasticity induction (Woodin et al.,  
323 2003; Chiu et al., 2018; Vickers et al., 2018; Udakis et al., 2020). Additionally, high-frequency stimulation of presy-  
324 naptic input pathways has been shown to potentiate inhibitory synapses (Caillard et al., 1999; Shew et al., 2000;  
325 Mellor, 2018). Finally, the amount of inhibitory LTP has been shown to depend on the postsynaptic rate (Wang  
326 and Maffei, 2014). We designed our nonlinear inhibitory plasticity mechanism to be consistent with these findings:  
327 both, pre- and postsynaptic activity is necessary to induce inhibitory plasticity and the amount of LTP depends on  
328 the postsynaptic rate. Nonetheless, our rule is inconsistent with some experimental data which found no inhibitory  
329 plasticity for very high postsynaptic rates (Wang and Maffei, 2014).

### 330 **Inhibitory plasticity as a metaplastic mechanism**

331 The ability of the proposed nonlinear inhibitory plasticity to control the sign and magnitude of excitatory plasticity  
332 resembles metaplasticity, i.e. a plasticity mechanism that is plastic itself (Yger and Gilson, 2015). We found that  
333 input perturbations modulate the excitatory presynaptic LTD/LTP threshold via a change of I-to-E weights and in-  
334 hibitory rates consistent with metaplasticity (Fig. 4). Previous computational work has already suggested that a  
335 linear inhibitory plasticity rule can implement a metaplastic mechanism (Clopath et al., 2016). What mechanism  
336 underlies the sliding LTD/LTP threshold during the induction of plasticity is still an open question. Some experi-  
337 mental studies have suggested that inhibition can control sign and magnitude of excitatory plasticity (Paille et al.,  
338 2013; Vogels et al., 2013; Wang and Maffei, 2014; Hiratani and Fukai, 2017). Most intriguingly, it has been shown  
339 that application of gamma-Aminobutyric acid (GABA) can increase the excitatory LTD/LTP threshold, while blocking  
340 GABA can decrease the excitatory LTD/LTP threshold (Steele and Mauk, 1999), in close agreement with our findings  
341 (Fig. 1C).

342 The metaplasticity of excitatory plasticity was first suggested theoretically with the Bienenstock-Cooper-Munro  
343 (BCM) rule (Bienenstock et al., 1982), and was later confirmed in sensory deprivation and restoration experiments  
344 (Kirkwood et al., 1996; Philpot et al., 2003; Kuo and Dringenberg, 2009; Philpot et al., 2003; Cooper and Bear, 2012).  
345 In the BCM rule, the metaplastic mechanism is implemented by sliding LTD/LTP threshold dependent on the ex-  
346 citatory postsynaptic rate (Intrator and Cooper, 1992; Cooper et al., 2004). Higher (lower) postsynaptic rates lead  
347 to a higher (lower) postsynaptic LTD/LTP threshold making LTP (LTD) induction harder. An important difference in  
348 our model to the BCM rule is that the metaplastic sliding of the LTD/LTP threshold  $c_{pre}^E$  depends on the presynaptic  
349 excitatory rate (Fig. 1C), whereas the postsynaptic LTD/LTP threshold  $c_{post}^E$  is fixed (except in Fig. 3D-F). This apparent  
350 difference can be resolved by assuming that homeostatic mechanisms operate at two different timescales: fast  
351 and slow. Slow homeostasis has been linked to a change in intrinsic excitability of neurons or synaptic scaling, for  
352 example, as during sliding of the postsynaptic LTD/LTP threshold as in the BCM rule (Keck et al., 2017). Fast home-  
353 ostasis might be linked to disinhibition and inhibitory plasticity (Gainey and Feldman, 2017), and we suggest this is  
354 the case during sliding of the presynaptic LTD/LTP threshold mediated by inhibitory plasticity. Hence, it is plausible  
355 that both, presynaptic and postsynaptic metaplasticity exist in neuronal circuits. An advantage of homeostasis via  
356 inhibitory plasticity, rather than a direct influence on the E-to-E weights, might be that there is no interference with  
357 stored information in E-to-E connections.

### 358 **Key features of the nonlinear inhibitory plasticity rule**

359 For the novel inhibitory plasticity rule to stabilize E-to-E weight dynamics, two key features need to be fulfilled.  
360 First, I-to-E weight changes need to be more 'dominant' than E-to-E weight changes (Fig. 2). More dominant means  
361 that I-to-E weights need to change LTD with a higher magnitude at each time step compared to E-to-E weights, for all

postsynaptic rates. If excitatory plasticity exceeds inhibitory plasticity for a certain postsynaptic rate as in the case of linear inhibitory plasticity, weight dynamics will be unstable (Fig. 1D-F). In our model, dominance of nonlinear inhibitory plasticity is guaranteed by the condition in Eq. 4, which involves relative number of synapses, presynaptic rates and plasticity timescales of excitation and inhibition to determine stability.

Second, matching the excitatory and inhibitory postsynaptic LTD/LTP thresholds, whereby excitatory and inhibitory synaptic change occur in the same direction for a given firing rate, is necessary for stable weight dynamics (Fig. 2A-C versus Fig. 3A-C). However, implementing a mechanism that dynamically shifts these thresholds in the opposite directions for excitatory vs. inhibitory plasticity based on experimental evidence (Keck et al., 2017), suggests that this match is not needed at all times. An interesting consequence from this dynamic threshold shift is a diversity of firing rates, which agrees with experimental data (Buzsáki and Mizuseki, 2014) and has recently been also achieved in different types of models (Pedrosa and Clopath, 2020; Agnes and Vogels, 2021).

We found that the new nonlinear inhibitory plasticity rule achieves an E/I ratio set-point (Fig. 5) in agreement with experimental data (D'amour and Froemke, 2015). We observed that inhibitory plasticity is the more dominant mechanism to achieve this. The dominance of inhibitory plasticity suggests a possible solution for the temporal paradox of integrating Hebbian excitatory plasticity and homeostasis (Zenke et al., 2017), eliminating the requirement for additional fast stabilizing mechanisms in our model. While the relative timescales of excitatory and inhibitory plasticity mechanisms remain an open question, most computational models agree on the need for faster inhibitory than excitatory plasticity dynamics (Sprekeler, 2017; Zenke et al., 2017).

### Functional implications of the nonlinear inhibitory plasticity rule

Our novel form of inhibitory plasticity leads to a fixed E/I balance, or more specifically to an E/I weight ratio set-point (Fig. 5A,C and Eq. 6). This is consistent with several experimental studies which have suggested that inhibitory plasticity keeps an E/I ratio set-point (Froemke et al., 2007; Maffei and Turrigiano, 2008; Dornn et al., 2010; House et al., 2011; Wang and Maffei, 2014; Xue et al., 2014; D'amour and Froemke, 2015; Adesnik, 2017; Field et al., 2020). For example, as our model would predict, some studies have found that the amount of inhibitory plasticity depends on how far the current E/I ratio is from the set point (Fig. 5F) (D'amour and Froemke, 2015; Aljadeff et al., 2019). Perturbing the excitatory input rate in our model as a model of sensory deprivation increases the E/I ratio (Fig. 5A), consistent with sensory deprivation experiments (Kuhlman et al., 2013; Li et al., 2014; Barnes et al., 2015; Miska et al., 2018). Despite the ability of the new nonlinear inhibitory plasticity rule to establish and maintain a fixed E/I balance, we acknowledge that there are various additional mechanisms that contribute, including heterosynaptic plasticity (Field et al., 2020).

The emergence of an E/I ratio set-point and the stabilization of rates driven by the novel inhibitory plasticity rule ensure a fixed E/I balance. E/I balance is usually more broadly defined as the proportionality of total excitatory and inhibitory input onto a neuron (Isaacson and Scanziani, 2011). In our model, once a fixed E/I balance is reached, there is no more synaptic plasticity and neurons fire at stable rates. To induce further weight changes, an additional gating signal is necessary that perturbs the E/I balance. In our model, there are three ways to gate plasticity: (1) directly changing the postsynaptic rate (Fig. 1B); (2) perturbing the excitatory input pathway (Fig. 4); and (3) perturbing the inhibitory population (Fig. 6C). The idea that inhibition gates excitatory plasticity is well-documented in the experimental literature (Dehorter et al., 2017; Hattori et al., 2017; Kripkee and Froemke, 2017).

Experimentally, both neuromodulation (Froemke et al., 2007; Froemke, 2015) and disinhibitory circuits (Letzkus et al., 2011, 2015; Wang and Yang, 2018; Williams and Holtmaat, 2019; Canto-Bustos et al., 2022) can directly control the activity of inhibitory neurons and lead to excitatory plasticity. Based on this, we investigated the gating of plasticity via a disinhibitory signal in the context of receptive field formation. While receptive field formation has already been demonstrated in multiple computational studies (Bienenstock et al., 1982; Luz and Shamir, 2012; Clopath et al., 2016), we propose that it can occur solely from the interaction of excitatory and inhibitory plasticity without any additional mechanism to induce competition among different inputs (Fig. 6D,E). Recurrently connecting multiple postsynaptic excitatory neurons and allowing the connections between them to be plastic leads to receptive field formation of each excitatory neuron in the recurrent circuit and the formation of strong bidirectional connectivity between neurons with similar receptive fields (Fig. 6F). This is in agreement with various experimental data (Ko et al., 2011, 2013; Miller et al., 2014; Lee et al., 2016) and has been previously achieved in models (Clopath et al., 2010; Litwin-Kumar and Doiron, 2014; Montangie et al., 2020).

412 Interestingly, we found that gating of receptive field formation via disinhibition depends on the specificity of the  
413 targeted inhibitory population to the inputs. While disinhibiting the unspecific population does not form receptive  
414 fields, disinhibiting all specific inhibitory populations induces competition between different inputs and forms  
415 receptive fields. If inhibitory plasticity counteracts excitatory plasticity in an input-specific way, no competition  
416 between input pathways can emerge because small biases in the E-to-E weights in one input are immediately  
417 balanced by I-to-E weights in the same input. Therefore, disrupting the specific inhibitory populations allows the  
418 strengthening of a subset of inputs. This result is similar to the findings of Clopath et al. (2016), where receptive  
419 field formation was shown to depend on the specificity of the inhibitory neurons.

420 The inhibitory populations in our model can be linked to the two main inhibitory neuron types in the cor-  
421 tex, somatostatin-expressing (SOM) and parvalbumin-expressing (PV) inhibitory interneurons. Specificity of the  
422 inhibitory neuron type to excitatory inputs can be interpreted as tuning of the inhibitory neurons to input features.  
423 In the visual (Ma et al., 2010; Cottam et al., 2013) and the auditory cortex (Li et al., 2015), tuning of SOM interneu-  
424 rons is sharper than PV interneurons, although conflicting evidence exists (Griffen and Maffei, 2014). Therefore,  
425 in our model the specific inhibitory neuron type could represent SOM interneurons while the unspecific inhibitory  
426 population could represent PV interneurons. Supporting this interpretation of SOM interneurons being the spe-  
427 cific inhibitory population, experimental studies find that a suppression of SOM neurons gates excitatory plasticity  
428 (Chen et al., 2015; Hattori et al., 2017; Williams and Holtmaat, 2019),

## 429 **Predictions**

430 We formulated our model with rate-based units not only because it enabled us to treat it analytically, but also  
431 because it led to an in-depth mechanistic understanding of the involved processes, allowing us to formulate ex-  
432 perimentally testable predictions and making our model assumptions falsifiable. A main feature of our model is  
433 that inhibitory plasticity depends nonlinearly on the rate of the postsynaptic excitatory neuron. This can be tested  
434 experimentally by inducing inhibitory plasticity while varying the rate of an excitatory neuron and keeping the in-  
435 hibitory input to this neuron constant. A second feature of our model is that excitatory and inhibitory plasticity  
436 have an identical postsynaptic LTD/LTP threshold. This could be tested by inducing plasticity at excitatory and in-  
437 hibitory pathways onto the same excitatory neuron, and measuring the LTD/LTP thresholds as a function of the  
438 rate of that neuron.

439 Based on the perturbation experiment (Fig. 4), we can formulate multiple predictions. First, we hypothesize  
440 that the mechanism behind the metaplastic mechanism is a change in the level of inhibition (see Fig. 1C, Fig. 4E).  
441 Therefore, blocking inhibitory plasticity experimentally should also disrupt the metaplastic mechanism. Second, we  
442 predict that the shape of inhibitory plasticity as a function of the inhibitory rate is reversed compared to excitatory  
443 plasticity, and perturbations of the excitatory input lead to specific metaplastic changes of inhibitory plasticity.  
444 Decreasing the excitatory input should lower the inhibitory LTD/LTP threshold as a function of the presynaptic  
445 inhibitory rate and decrease the inhibitory LTP magnitude (Fig. 4F). Third, following from the dependence of the  
446 line of stable fixed point on several model parameters (Fig. 2C and Eq. 5), especially on the excitatory input rate  
447 (Fig. 4D), we hypothesize that different E/I ratios can be achieved following input perturbations. Decreasing the  
448 excitatory input rate should lead to higher E/I ratios, while increasing it to lower E/I ratios.

449 The new rule suggests a new functional role of inhibitory plasticity, namely controlling E-to-E weight dynamics.  
450 Therefore, we extend previously studied roles of inhibitory plasticity, which include the stabilization of excitatory  
451 rates (Vogels et al., 2011; Sprekeler, 2017), decorrelation of neuronal responses (Duarte and Morrison, 2014), pre-  
452 venting winner-take-all mechanisms in networks with multiple stable states (Litwin-Kumar and Doiron, 2014) or  
453 generating differences among novel versus familiar stimuli (Schulz et al., 2021). Recent computational studies also  
454 include novel ways of inhibitory influence, like presynaptic inhibition via GABA spillover (Naumann and Sprekeler,  
455 2020) or an input-dependent inhibitory plasticity mechanism (Kaleb et al., 2021).

456 Our model included a single type of inhibitory plasticity. Yet, recent studies have found that cortical circuits have  
457 abundance of different inhibitory interneuron types and that inhibitory plasticity depends on the inhibitory neuron  
458 type (Chiu et al., 2018; Vickers et al., 2018; Udakis et al., 2020; Lagzi et al., 2021). Our result on inhibitory population-  
459 dependent effects in gating receptive field formation suggests that subtype-specific plasticity rules might have  
460 non-trivial influences on the network, as some recent models have proposed (Agnes et al., 2020; Lagzi et al., 2021).  
461 Furthermore, other homeostatic mechanisms will influence the stability of weight dynamics, E/I ratio set-points

462 and the effect different perturbations have on the network dynamics.

## 463 Conclusion

464 Taken together, our study proposed a novel form of nonlinear inhibitory plasticity which can achieve stable firing  
 465 rates and synaptic weights without the need for any additional homeostatic mechanisms. Moreover, our proposed  
 466 plasticity is fast, and hence could provide a solution to the temporal paradox problem because it can counteract fast  
 467 Hebbian excitatory plasticity. Functionally, our proposed inhibitory plasticity can establish and maintain a fixed E/I  
 468 ratio set-point. At this set-point, no synaptic plasticity is induced, i.e. plasticity is "off". Perturbing the postsynaptic  
 469 firing rate, e.g. via disinhibition, can act as a gate, turning plasticity "on". This enables the competition among  
 470 input streams leading to receptive field formation in feedforward and recurrent circuits. Therefore, our nonlinear  
 471 inhibitory plasticity mechanism provides a solution to the stability-flexibility challenge.

## 472 Methods

### 473 Rate-based model

474 We studied rate-based neurons to allow us to analytically investigate the dynamics of firing rates and synaptic  
 475 weights in the model. In the feedforward motif (Fig. 1A), we considered a network consisting of one excitatory  
 476 postsynaptic population with a linear threshold transfer function and firing rate  $v^E$ , receiving input  $N^E$  presynap-  
 477 tic excitatory populations with firing rates  $\rho^E$  through synapses with weights  $w^{EE}$ , and  $N^I$  presynaptic inhibitory  
 478 populations with firing rates  $v^I$  through synapses with weights  $w^{EI}$ :

$$\tau_{FR}^E \dot{v}^E = -v^E + \left[ \sum_{j=1}^{N^E} \rho_j^E w_j^{EE} - \sum_{k=1}^{N^I} v_k^I w_k^{EI} \right]_+, \quad (7)$$

479 where  $[\ ]_+$  denotes a rectification that sets negative values to zero. The inhibitory neurons also follow a similar  
 480 dynamics and are driven by the same  $N^E$  presynaptic excitatory populations with firing rates  $\rho^E$  through synapses  
 481 with weights  $w^{IE}$  and additional external input with firing rate  $\rho^I$ ,

$$\tau_{FR}^I \dot{v}_k^I = -v_k^I + \left[ \sum_{j=1}^{N^E} \rho_j^E w_j^{IE} + \rho_k^I \right]_+. \quad (8)$$

482 Here,  $\tau_{FR}^E, \tau_{FR}^I$  denote the time constants of the firing rate dynamics. All parameters are given in Table 1. The  
 483 synaptic weights,  $w^{EE}$  and  $w^{EI}$  are plastic according to different plasticity rules (see below). For simplicity, we do  
 484 not use subscripts for neuron identity and interpret all variables as mean values and hence can denote the total  
 485 excitatory input to the postsynaptic neuron as  $N^E \rho^E w^{EE}$  and the total inhibitory input as  $N^I v^I w^{EI}$ . In the mean-  
 486 field sense, also the number of neurons can be traded-off with the rates or the synaptic weights, hence we assume  
 487  $N^E = N^I = 1$  (Table 1).

### 488 Rate-based plasticity

489 For the plasticity of E-to-E synaptic weights  $w^{EE}$ , we used a learning rule that depends nonlinearly on the postsy-  
 490 naptic rate  $v^E$  (Fig. 1B) (Kirkwood et al., 1996; Philpot et al., 2003; Cooper and Bear, 2012):

$$\tau_w^E \dot{w}^{EE} = \rho^E v^E (v^E - c_{post}^E). \quad (9)$$

491 Here,  $\tau_w^E$  is the timescale of excitatory plasticity which is much longer than the timescale of the neuronal dynamics.  
 492 The plasticity changes sign at the 'postsynaptic LTD/LTP threshold',  $c_{post}^E$ .

493 For the plasticity of I-to-E synaptic weights  $w^{EI}$ , we used two learning rules. First, we used an inhibitory plasticity  
 494 rule common in computational models (Vogels et al., 2011; Clopath et al., 2016), which depends linearly on the  
 495 postsynaptic rate  $v^E$  (Fig. 1D,  $w^{EI}$ ):

$$\tau_w^I \dot{w}^{EI} = v^I (v^E - c_{post}^I). \quad (10)$$

496 Here,  $\tau_w^I$  denotes the timescale of inhibitory plasticity which again is much longer than the timescale of the neuronal  
 497 dynamics. As for excitatory plasticity, inhibitory plasticity changes from LTD to LTP at the 'inhibitory postsynaptic

**Table 1. Parameter values for figures, ★ denotes that values are provided in the figure captions.**

| Symbol            | Description                                 | Fig. 1 | Fig. 2  | Fig. 3 | Fig. 4 | Fig. 5 | Fig. 6B,C | Fig. S1 |
|-------------------|---------------------------------------------|--------|---------|--------|--------|--------|-----------|---------|
| $w_0^{EE}$        | Initial E-to-E weight                       |        | ★       |        | 1.5    | ★      | 0.7       | 1.5     |
| $w_0^{EI}$        | Initial I-to-E weight                       |        | ★       |        | 0.5    | ★      |           | 0.5     |
| $w^{IE}$          | I-to-E weight                               |        |         |        | 0.5    |        |           | ★       |
| $\rho^E$          | Presynaptic E rate                          |        | 2 Hz    |        | ★      | 2 Hz   | ★         | 2 Hz    |
| $\rho^I$          | External E rate onto I neurons              |        | 0.5 Hz  |        |        |        | ★         | 0.5 Hz  |
| $N^E$             | Number of presyn. E neurons                 |        |         |        |        | 1      |           |         |
| $N^I$             | Number of I neurons                         |        |         |        |        | 1      |           |         |
| $\tau_{ER}^{E/I}$ | Time constants for E/I neuron rate dynamics |        | 10 ms   |        |        |        |           |         |
| $\tau_w^E$        | Timescale for E plasticity                  |        | 1000 ms |        |        |        |           | 500 ms  |
| $\tau_w^I$        | Timescale for I plasticity                  |        | 200 ms  |        |        |        |           | 1000 ms |
| $c_{post}^E$      | E postsyn. LTD/LTP threshold                | 1 Hz   |         | ★      | 1 Hz   |        |           |         |
| $c_{post}^I$      | I postsyn. LTD/LTP threshold                | 1 Hz   |         | ★      | 1 Hz   |        |           |         |

498 LTD/LTP threshold',  $c_{post}^I$ , which sets the 'target rate' of the postsynaptic neuron (Vogels et al., 2011). In our paper,  
 499 we proposed a novel inhibitory plasticity rule, which also depends nonlinearly on postsynaptic excitatory activity  
 500 just like excitatory plasticity (Fig. 2A):

$$\tau_w^I \dot{w}^{EI} = v^I v^E (v^E - c_{post}^I). \quad (11)$$

501 For both inhibitory plasticity rules, we assumed that the excitatory and inhibitory thresholds are matched ( $c_{post}^E =$   
 502  $c_{post}^I$ ) to prevent excitatory and inhibitory plasticity pushing the postsynaptic excitatory neuron towards two differ-  
 503 ent firing rates. The except for this was the dynamic mechanism for thresholds adjustment in Fig. 3.

#### 504 LTD/LTP plasticity thresholds

505 As can be see in the equations for excitatory and inhibitory plasticity, the postsynaptic LTD/LTP thresholds, which  
 506 determine the sign of plasticity as a function of postsynaptic excitatory activity, are fixed. However, in the main  
 507 text we also introduce the concept of a presynaptic LTD/LTP thresholds, defined as the presynaptic excitatory rate  
 508 at which no synaptic plasticity is induced. We consider  $v^E$  at steady state ( $v^E = [N^E \rho^E w^{EE} - N^I v^I w^{EI}]_+$ ) and assume  
 509 that the dynamics of the rates is in the region where the transfer function is linear. Therefore, we can drop the  
 510 linear rectifier and solve for  $\rho^E$  at which Eq. 1 is zero. We derive the presynaptic LTD/LTP threshold as:

$$c_{pre}^E = \frac{c_{post} + N^I v^I w^{EI}}{N^E w^{EE}}. \quad (12)$$

#### 511 Stability analysis

512 To investigate the stability of the weights, we first calculated the nullclines, where we assumed that the postsynaptic  
 513 excitatory rate is at steady state  $v^E = [N^E \rho^E w^{EE} - N^I v^I w^{EI}]_+$ . By setting Eqs. 9 and 11 to zero and dropping the  
 514 linear rectifier, i.e.  $v^E = N^E \rho^E w^{EE} - N^I v^I w^{EI}$ , we can write

$$\begin{aligned} w^{EI} &= \frac{N^E \rho^E w^{EE} - c_{post}^E}{N^I v^I}, \\ w^{EI} &= \frac{N^E \rho^E w^{EE} - c_{post}^I}{N^I v^I}. \end{aligned} \quad (13)$$

515 We see that the two equations are identical if  $c_{post}^E = c_{post}^I$ . Therefore, only for identical LTD/LTP thresholds ( $c_{post}^E = c_{post}^I$ )  
 516 a line of fixed points emerges. The fixed points are  $[w_*^{EE}, w_*^{EI}] = [x, (N^E \rho^E x - c_{post}) / (N^I v^I)]$ , where we require that  
 517  $x \geq c_{post} / (N^E \rho^E)$  to avoid negative weights. To calculate the stability of the line of fixed points, we calculate the  
 518 eigenvalues. We can rewrite Eqs. 9 and 11, as

$$\begin{aligned} \dot{w}^{EE} &= \frac{\rho^E}{\tau_w^E} \left( (N^E \rho^E w^{EE})^2 + (N^I v^I w^{EI})^2 - 2N^E N^I \rho^E v^I w^{EE} w^{EI} - N^E \rho^E w^{EE} c_{post} + N^I v^I w^{EI} c_{post} \right) = f \\ \dot{w}^{EI} &= \frac{v^I}{\tau_w^I} \left( (N^E \rho^E w^{EE})^2 + (N^I v^I w^{EI})^2 - 2N^E N^I \rho^E v^I w^{EE} w^{EI} - N^E \rho^E w^{EE} c_{post} + N^I v^I w^{EI} c_{post} \right) = g \end{aligned} \quad (14)$$



519 where we drop the linear rectifier by assuming that the dynamics of the rates is in the region where the transfer  
520 function is linear. We find that the entries of the Jacobian matrix at the fixed points are

$$J_* = \begin{pmatrix} \frac{\partial f}{\partial w^{EE}} & \frac{\partial f}{\partial w^{EI}} \\ \frac{\partial g}{\partial w^{EE}} & \frac{\partial g}{\partial w^{EI}} \end{pmatrix} = \begin{pmatrix} \frac{N^E (\rho^E)^2 c_{post}}{\tau_w^E} & -\frac{N^I \rho^E v^I c_{post}}{\tau_w^E} \\ \frac{N^E \rho^E v^I c_{post}}{\tau_w^I} & -\frac{N^I (v^I)^2 c_{post}}{\tau_w^I} \end{pmatrix}. \quad (15)$$

521 The trace of the Jacobian is  $Tr(J_*) = \frac{N^E (\rho^E)^2 c_{post}}{\tau_w^E} - \frac{N^I (v^I)^2 c_{post}}{\tau_w^I}$  and the determinant is zero  $Det(J_*) = 0$ , therefore we  
522 find that the eigenvalues are:

$$\lambda_{1,2} = \frac{1}{2} \left( Tr(J_*) \pm \sqrt{Tr(J_*)^2 - 4 Det(J_*)} \right) = \begin{cases} Tr(J_*), \\ 0. \end{cases} \quad (16)$$

523 This means that if  $Tr(J_*) < 0$ , the system is stable. Reordering this condition leads to the stability condition derived  
524 in the main text as Eq. 4. By reordering the terms in the nullclines given in Eq. 13, we derive the line attractor  
525 equation as given in the main text in Eq. 5.

526 The nonlinear excitatory and inhibitory plasticity rules have a fixed point when the postsynaptic excitatory firing  
527 rate is  $v^E = 0$  Hz. Therefore, in the phase plane of  $w^{EE}$  and  $w^{EI}$  weights there is a region where the total inhibitory  
528 input is larger than the total excitatory input,  $N^E \rho^E w^{EE} < N^I v^I w^{EI}$ , resulting in no postsynaptic firing (Fig. 2B,  
529 above grey line). The line equation separating the space with and without weight dynamics is

$$530 \quad w^{EI} = \frac{N^E \rho^E w^{EE}}{N^I v^I}. \quad (17)$$

531 In the case of the linear inhibitory plasticity rule, stability depends on the initial weights. The line which separates  
532 stable from unstable initial weights can be calculated by taking the ratio of Eq. 9 and Eq. 10 and equating that to  
533 the slope of the line attractor (Eq. 5):

$$534 \quad \frac{\dot{w}^{EI}}{\dot{w}^{EE}} = \frac{\tau_w^E v^I}{\tau_w^I \rho^E (N^E \rho^E w^{EE} - N^I v^I w^{EI})} = \frac{N^E \rho^E}{N^I v^I} \quad (18)$$

535 which leads to

$$w^{EI} = \frac{N^E \rho^E}{N^I v^I} w^{EE} - \frac{v^I \tau_w^E}{N^E (\rho^E)^2 \tau_w^I}, \quad (19)$$

536 which is the equation of the dashed line in Fig. 1E.

### 537 **Dynamic threshold matching**

538 The equations for the dynamics postsynaptic LTD/LTP thresholds in Fig. 3D-F are

$$\begin{aligned} \tau_{c_{post}^E} \dot{c}_{post}^E &= \Delta w^{EE} \\ \tau_{c_{post}^I} \dot{c}_{post}^I &= -\Delta w^{EI} \end{aligned} \quad (20)$$

539 and therefore  $c_{post}^E$  increases (decreases) if the postsynaptic neuron fires at  $v^E > c_{post}^E$  ( $v^E < c_{post}^E$ ) and  $c_{post}^I$  decreases  
540 (increases) if the postsynaptic neuron fires at  $v^E > c_{post}^I$  ( $v^E < c_{post}^I$ ). The amount of increase or decrease of the  
541 postsynaptic thresholds is scaled by the amount of plasticity induction, and we used a timescale of  $\tau_c^{E/I} = 2$  ms,  
542 which is faster than the timescale of excitatory and inhibitory plasticity (Table 1).

### 543 **E/I ratio**

544 We can calculate the E/I weight ratio  $R^{E/I}$  in Eq. 6 by rewriting Eq. 13 and dividing one of the nullclines by  $w^{EI}$ . For  
545 large weights, or in mathematical terms for  $w^{EI} \rightarrow \infty$ , the E/I ratio becomes  $\lim_{w^{EI} \rightarrow \infty} R^{E/I} = R_\infty^{E/I} = \frac{N^I v^I}{N^E \rho^E}$ .

546 To calculate the E/I ratio  $R^{E/I}$ , we take the solution for one nullcline from Eq. 13 (since  $c_{post}^E = c_{post}^I = c_{post}$  both  
547 are equivalent) and re-order the terms to reach Eq. 6. In the feedforward circuit (Fig. 1A), it follows

$$R_\infty^{E/I} = \frac{N^I v^I}{N^E \rho^E} = \frac{N^I (\rho^I + w^{IE} \rho^E)}{N^E \rho^E} = \frac{N^I}{N^E} \left( \frac{\rho^I}{\rho^E} + w^{IE} \right). \quad (21)$$

548 For the assumption  $N^E = N^I$  it follows that for larger excitatory input rate  $\rho^E$  the E/I ratio reaches a set-point at  
549  $R_{\infty}^{E/I} \approx w^{IE}$  (see Fig. 5A, where  $w^{IE} = 0.5$ ). Therefore, the E/I ratio has a lower bound which depends on the strength  
550 of the connection from the excitatory-to-inhibitory population.

551 In Fig. 5, we link our model to the experimental findings in D'amour and Froemke (2015). In D'amour and  
552 Froemke (2015), the authors induce plasticity with a spike-pairing protocol, in which pre-post spikes elicit excitatory  
553 LTP while post-pre spikes elicit LTD. Inhibitory LTP was induced for short time differences between the pre- and  
554 postsynaptic spikes (independent of the order of the spikes) and inhibitory LTD for longer time differences of  
555 the spike pairs. Since in the experiments the presynaptic stimulation was done with a stimulation electrode, the  
556 excitatory and inhibitory inputs did not have to be functionally related. In the model, we randomly drew initial E-to-  
557 E and I-to-E weights and induced plasticity for a limited amount of time (100ms) based on the rate-based plasticity  
558 rules (Eqs. 9 and 11).

### 559 **Gating of receptive field formation and recurrent clustering**

560 Here, we explore a feedforward network with multiple inputs and two inhibitory neuron populations (Fig. 6C). To  
561 form receptive fields, we provide a random patterned input to the network. We define a pattern to mean an  
562 increase in the input rate to 4 Hz for 100 ms of four neurons. We then disinhibit the postsynaptic neurons by in-  
563 hibiting either the total unspecific or specific inhibitory populations for 60 s by inducing an inhibitory input of 2 Hz  
564 onto the respective inhibitory neuron population. We model the release of disinhibition for the specific inhibitory  
565 population as slow and gradual over a time course of 100 s to avoid complete silencing of the postsynaptic excita-  
566 tory neurons. We also note that here we used instantaneous integrators, i.e.  $\tau_{FR}^E = \tau_{FR}^I = dt$  (Table 2), because we  
567 only wanted to focus on the interaction of excitatory and inhibitory plasticity in the model, though see (Gjorgjieva  
568 et al., 2016).

569 For the recurrent circuit, we connected recurrently 30 postsynaptic neurons with feedforward circuits with  
570 specific and unspecific inhibition as described above (see also Fig. 6D,E) using an initial weight of  $w_{RC,0}^{EE} = 0.001$ . In  
571 addition to feedforward excitatory and inhibitory weights, also recurrent excitatory weights were plastic based on  
572 the plasticity mechanism of Eq. 9. We allowed the input patterns to each of the recurrent excitatory neuron to be  
573 correlated. Initial recurrent excitatory weights were randomly drawn from the interval  $[0,0.18]$ . To get the input to  
574 which recurrent neurons formed a receptive field to, we calculated the mean weight per input pattern and chose  
575 the maximum of those to be the input the neurons formed a receptive field to. The clustering graph in Fig. 6F (left)  
576 was done with the digraph function in Matlab.

577 The simulations were performed using Matlab programming language. Euler integration was implemented  
578 using a time step of 0.1 ms. Code implementing our model is available here: [https://github.com/comp-neural-circuits/](https://github.com/comp-neural-circuits/Nonlinear-inhibitory-plasticity)  
579 [Nonlinear-inhibitory-plasticity](https://github.com/comp-neural-circuits/Nonlinear-inhibitory-plasticity).

### 580 **Acknowledgements**

581 CM and JG thank the Max Planck Society for funding and a NARSAD Young Investigator Grant from the Brain and Be-  
582 havior Research Foundation to JG. We also thank the Deutsche Forschungsgemeinschaft (DFG) for funding through  
583 the Collaborative Research Centre (CRC) 1080. We thank all members of the 'Computation in Neural Circuits' group  
584 for useful discussions and comments on the manuscript.

**Table 2. Parameter values for Fig. 6E,F.**

| Symbol            | Description                               | Fig. 6E | Fig. 6F  |
|-------------------|-------------------------------------------|---------|----------|
| $w_0^{EE}$        | Initial E-to-E weight                     | 0.03    | [0,0.18] |
| $w_{spec,0}^{EI}$ | Initial specific I-to-E weight            | 0.01    |          |
| $w_{unsp,0}^{EI}$ | Initial unspecific I-to-E weight          | 0.01    |          |
| $w_{spec}^{IE}$   | Specific E-to-I weight (fixed)            | 0.2     | 0.002    |
| $w_{unsp}^{IE}$   | Unspecific E-to-I weight (fixed)          | 0.02    | 0.001    |
| $\rho^E$          | Presynaptic E rate                        | 1 Hz    |          |
| $\rho_{spec}^I$   | External E rate onto specific I neurons   | 0 Hz    |          |
| $\rho_{unsp}^I$   | External E rate onto unspecific I neurons | 0 Hz    |          |
| $N^E$             | Number of presyn. E neurons               | 40      |          |
| $N_{spec}^I$      | Number of specific I neurons              | 20      |          |
| $N_{unsp}^I$      | Number of unspecific I neurons            | 20      |          |
| $\tau_{FR}^E$     | Timescale for E neuron model              | 0.1 ms  |          |
| $\tau_{FR}^I$     | Timescale for I neuron model              | 0.1 ms  |          |
| $\tau_w^E$        | Timescale for E plasticity                | 1000 ms |          |
| $\tau_w^I$        | Timescale for I plasticity                | 200 ms  |          |
| $c_{post}^E$      | E postsyn. LTD/LTP threshold              | 1 Hz    |          |
| $c_{post}^I$      | I postsyn. LTD/LTP threshold              | 1 Hz    |          |

585 **Supplementary Material**

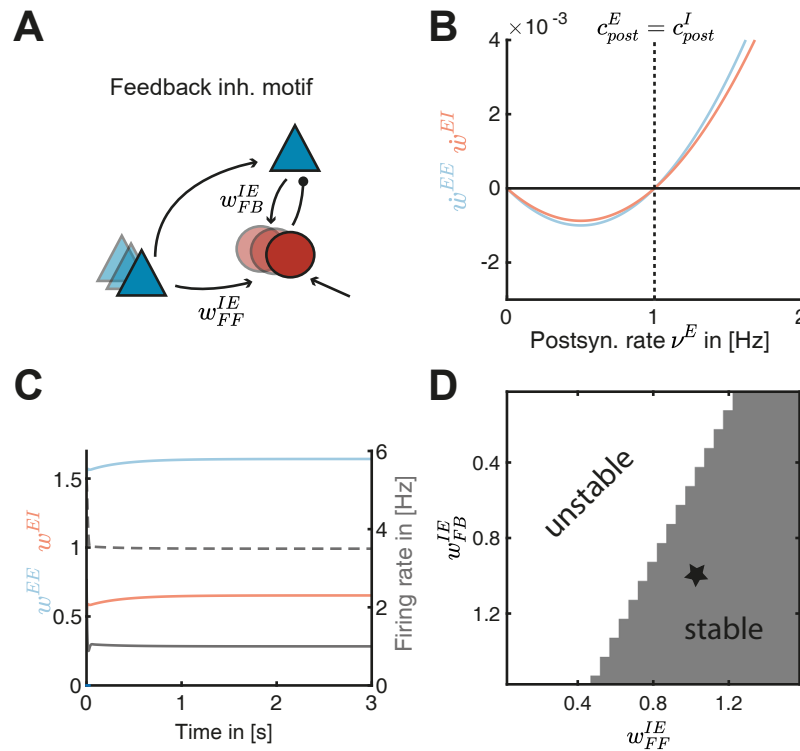

**Figure S1. Feedback inhibitory motif leads to additional stability.** **A.** Schematic of the feedback inhibitory motif. The inhibitory population receives input from the presynaptic excitatory population with weight strength  $w_{FF}^{IE}$  and the excitatory postsynaptic neuron with weight strength  $w_{FB}^{IE}$ . **B.** Plasticity of E-to-E ( $\dot{w}^{EE}$ , blue) and I-to-E ( $\dot{w}^{EI}$ , red) weights as a function of the postsynaptic rate  $\nu^E$ . The excitatory and inhibitory LTD/LTP thresholds are identical ( $c_{post}^E = c_{post}^I$ ). **C.** E-to-E ( $w^{EE}$ , blue) and I-to-E ( $w^{EI}$ , red) and rate dynamics of the postsynaptic (grey line) and the inhibitory population (grey dashed line) as a function of time. **D.** Stability of weight dynamics as a function of the excitatory-to-inhibitory weights  $w_{FB}^{IE}$  and  $w_{FF}^{IE}$ . Star indicates the values shown in panel C.

## References

- 586  
587 Abbott LF, Nelson SB. Synaptic plasticity: taming the beast. *Nature Neuroscience*. 2000; 3:1178–1183. doi:  
588 <https://doi.org/10.1038/81453>.
- 589 Abraham WC. Metaplasticity: Tuning synapses and networks for plasticity. *Nature Reviews Neuroscience*. 2008; 9:387–399. doi:  
590 <https://doi.org/10.1038/nrn2356>.
- 591 Abraham WC, Bear MF. Metaplasticity: plasticity of synaptic plasticity. *Trends Neuroscience*. 1996; 19:126–130. doi:  
592 [https://doi.org/10.1016/S0166-2236\(96\)80018-X](https://doi.org/10.1016/S0166-2236(96)80018-X).
- 593 Adesnik H. Synaptic Mechanisms of Feature Coding in the Visual Cortex of Awake Mice. *Neuron*. 2017; 95:1147–1159. doi:  
594 <http://dx.doi.org/10.1016/j.neuron.2017.08.014>.
- 595 Agnes EJ, Luppi AI, Vogels TP. Complementary inhibitory weight profiles emerge from plasticity and allow flexible switching of  
596 receptive fields. *Journal of Neuroscience*. 2020; 40(50):9634–9649. doi: <https://doi.org/10.1523/JNEUROSCI.0276-20.2020>.
- 597 Agnes EJ, Vogels TP. Interacting synapses stabilise both learning and neuronal dynamics in biological networks. *bioRxiv*. 2021;  
598 doi: <https://doi.org/10.1101/2021.04.01.437962>.
- 599 Ahmadian Y, Miller KD. What is the dynamical regime of cerebral cortex? *Neuron*. 2021; 109(21):3373–3391. doi:  
600 <https://doi.org/10.1016/j.neuron.2021.07.031>.
- 601 Aljadeff J, D'amour J, Field RE, Froemke RC, Clopath C. Cortical credit assignment by Hebbian, neuromodulatory and inhibitory  
602 plasticity. *arXiv*. 2019; doi: <https://arxiv.org/abs/1911.00307>.
- 603 Allen CB, Celikel T, Feldman DE. Long-term depression induced by sensory deprivation during cortical map plasticity in vivo.  
604 *Nature Neuroscience*. 2003; 6(3):291–299. doi: <https://doi.org/10.1038/nn1012>.

- 605 Barnes SJ, Sammons RP, Jacobsen RI, Mackie J, Keller GB, Keck T. Subnetwork-Specific Homeostatic Plasticity in Mouse Visual  
606 Cortex In Vivo. *Neuron*. 2015; 86:1290–1303. doi: <http://dx.doi.org/10.1016/j.neuron.2015.05.010>.
- 607 Bienenstock EL, Cooper LN, Munro PW. Theory for the development of neuron selectivity: orientation specificity and binocular  
608 interaction in visual cortex. *The Journal of Neuroscience*. 1982; 2(1):32–48. doi: [https://doi.org/10.1523/JNEUROSCI.02-01-](https://doi.org/10.1523/JNEUROSCI.02-01-00032.1982)  
609 [00032.1982](https://doi.org/10.1523/JNEUROSCI.02-01-00032.1982).
- 610 Buzsáki G, Mizuseki K. The log-dynamic brain: How skewed distributions affect network operations. *Nature Reviews Neuro-*  
611 *science*. 2014; 15(4):264–278. doi: <https://doi.org/10.1038/nrn3687>.
- 612 Caillard O, Ben-Ari Y, Gaiarsa JL. Long-term potentiation of GABAergic synaptic transmission in neonatal rat hippocampus. *Journal*  
613 *of Physiology*. 1999; 518(1):109–119. doi: <https://doi.org/10.1111/j.1469-7793.1999.0109r.x>.
- 614 Canto-Bustos M, Friason FK, Bassi C, Oswald AMM. Disinhibitory circuitry gates associative synaptic plasticity in olfactory cortex.  
615 *Journal of Neuroscience*. 2022; 17:1369–21. doi: <https://doi.org/10.1523/jneurosci.1369-21.2021>.
- 616 Chen JL, Lin WC, Cha JW, So PT, Kubota Y, Nedivi E. Structural basis for the role of inhibition in facilitating adult brain plasticity.  
617 *Nature Neuroscience*. 2011; 14(5):587–596. doi: <https://doi.org/10.1038/nn.2799>.
- 618 Chen JL, Villa KL, Cha JW, So PTC, Kubota Y, Nedivi E. Clustered Dynamics of Inhibitory Synapses and Dendritic Spines in the Adult  
619 Neocortex. *Neuron*. 2012; 74:361–373. doi: <http://dx.doi.org/10.1016/j.neuron.2012.02.030>.
- 620 Chen SX, Kim AN, Peters AJ, Komiyama T. Subtype-specific plasticity of inhibitory circuits in motor cortex during motor learning.  
621 *Nature Neuroscience*. 2015; 18(8):1109–1115. doi: <https://doi.org/10.1038/nn.4049>.
- 622 Chistiakova M, Bannon NM, Chen JY, Bazhenov M, Volgushev M. Homeostatic role of heterosynaptic plasticity: models and  
623 experiments. *Frontiers in Computational Neuroscience*. 2015; 9. doi: <https://doi.org/10.3389/fncom.2015.00089>.
- 624 Chiu CQ, Martenson JS, Yamazaki M, Natsume R, Sakimura K, Tomita S, Tavalin SJ, Higley MJ. Input-Specific NMDAR-Dependent  
625 Potentiation of Dendritic GABAergic Inhibition. *Neuron*. 2018; 97:368–377. doi: <https://doi.org/10.1016/j.neuron.2017.12.032>.
- 626 Clopath C, Büsing L, Vasilaki E, Gerstner W. Connectivity reflects coding: a model of voltage-based STDP with homeostasis. *Nature*  
627 *Neuroscience*. 2010; 13(3):344–352. doi: <https://doi.org/10.1038/nn.2479>.
- 628 Clopath C, Vogels TP, Froemke RC, Sprekeler H. Receptive field formation by interacting excitatory and inhibitory synaptic plas-  
629 ticity. *bioRxiv*. 2016; <https://doi.org/10.1101/066589>, doi: 10.1101/066589.
- 630 Cooper LN, Bear MF. The BCM theory of synapse modification at 30: interaction of theory with experiment. *Nature Reviews*  
631 *Neuroscience*. 2012; 13(11):798–810. doi: <https://doi.org/10.1038/nrn3353>.
- 632 Cooper LN, Intrator N, Blais BS, Shouval HZ. *Theory of cortical plasticity*. World Scientific Publishing; 2004.
- 633 Cottam JCH, Smith SL, Häusser M. Target-Specific Effects of Somatostatin-Expressing Interneurons on Neocortical Visual Process-  
634 ing. *Journal of Neuroscience*. 2013; 33(50):19567–19578. doi: <https://doi.org/10.1523/jneurosci.2624-13.2013>.
- 635 D’amour JA, Froemke RC. Inhibitory and Excitatory Spike-Timing-Dependent Plasticity in the Auditory Cortex. *Neuron*. 2015;  
636 86:514–528. doi: <https://doi.org/10.1016/j.neuron.2015.03.014>.
- 637 Debanne D, Inglebert Y, Russier M. Plasticity of intrinsic neuronal excitability. *Current Opinion in Neurobiology*. 2019; 54:73–82.  
638 doi: <https://doi.org/10.1016/j.conb.2018.09.001>.
- 639 Dehorter N, Marichal N, Marín O, Berninger B. Tuning neural circuits by turning the interneuron knob. *Current Opinion in*  
640 *Neurobiology*. 2017; 42:144–151. doi: <http://dx.doi.org/10.1016/j.conb.2016.12.009>.
- 641 Desai NS, Rutherford LC, Turrigiano GG. Plasticity in the intrinsic excitability of cortical pyramidal neurons. *Nature Neuroscience*.  
642 1999 6; 2(6):515–520. doi: <https://doi.org/10.1038/9165>.
- 643 Dorrn AL, Yuan K, Barker AJ, Schreiner CE, Froemke RC. Developmental sensory experience balances cortical excitation and  
644 inhibition. *Nature*. 2010; 465:932–936. doi: <https://doi.org/10.1038/nature09119>.
- 645 Duarte RCF, Morrison A. Dynamic stability of sequential stimulus representations in adapting neuronal networks. *Frontiers in*  
646 *Computational Neuroscience*. 2014; 8(124). doi: <https://doi.org/10.3389/fncom.2014.00124>.
- 647 Field RE, D’amour JA, Tremblay R, Miehl C, Rudy B, Gjorgjieva J, Froemke RC. Heterosynaptic Plasticity Determines the Set Point  
648 for Cortical Excitatory-Inhibitory Balance. *Neuron*. 2020; 106(5):842–854. doi: <https://doi.org/10.1016/j.neuron.2020.03.002>.
- 649 Fox K, Stryker M. Integrating Hebbian and homeostatic plasticity: Introduction. *Philosophical Transactions of the Royal Society*  
650 *B*. 2017; 372:20160413. doi: <http://dx.doi.org/10.1098/rstb.2016.0413>.

- 651 Froemke RC. Plasticity of Cortical Excitatory-Inhibitory Balance. *Annual Review of Neuroscience*. 2015; 38:195–219. doi:  
652 <https://doi.org/10.1146/annurev-neuro-071714-034002>.
- 653 Froemke RC, Merzenich MM, Schreiner CE. A synaptic memory trace for cortical receptive field plasticity. *Nature*. 2007; 450:425–  
654 429. doi: <https://doi.org/10.1038/nature06289>.
- 655 Fusi S. Computational models of long term plasticity and memory. *arXiv*. 2017; doi: <https://doi.org/10.48550/arXiv.1706.04946>.
- 656 Gainey MA, Feldman DE. Multiple shared mechanisms for homeostatic plasticity in rodent somatosensory and visual cortex. *Philosophical Transactions of the Royal Society B: Biological Sciences*. 2017; 372(1715). doi: <https://doi.org/10.1098/rstb.2016.0157>.
- 658 Gjorgjieva J, Drion G, Marder E. Computational implications of biophysical diversity and multiple timescales  
659 in neurons and synapses for circuit performance. *Current Opinion in Neurobiology*. 2016; 37:44–52. doi:  
660 <http://dx.doi.org/10.1016/j.conb.2015.12.008>.
- 661 Griffen TC, Maffei A. GABAergic synapses: their plasticity and role in sensory cortex. *Frontiers in Cellular Neuroscience*. 2014;  
662 8(91). doi: <https://doi.org/10.3389/fncel.2014.00091>.
- 663 Hattori R, Kuchibhotla KV, Froemke RC, Komiyama T. Functions and dysfunctions of neocortical inhibitory neuron subtypes.  
664 *Nature Neuroscience*. 2017; 20(9):1199–1208. doi: <https://doi.org/10.1038/nn.4619>.
- 665 Hebb DO. *The organization of behavior; a neuropsychological theory*. Wiley; 1949.
- 666 Hengen KB, Lambo ME, VanHooser SD, Katz DB, Turrigiano GG. Firing rate homeostasis in visual cortex of freely behaving rodents.  
667 *Neuron*. 2013; 80(2):335–342. doi: <http://dx.doi.org/10.1016/j.neuron.2013.08.038>.
- 668 Hennequin G, Agnes EJ, Vogels TP. Inhibitory Plasticity: Balance, Control, and Codependence. *Annual Review of Neuroscience*.  
669 2017; 40:557–579. doi: <https://doi.org/10.1146/annurev-neuro-072116-031005>.
- 670 Herstel LJ, Wierenga CJ. Network control through coordinated inhibition. *Current Opinion in Neurobiology*. 2021; 67:1–8. doi:  
671 <https://doi.org/10.1016/j.conb.2020.08.001>.
- 672 Hiratani N, Fukai T. Detailed Dendritic Excitatory/Inhibitory Balance through Heterosynaptic Spike-Timing-Dependent Plas-  
673 ticity. *The Journal of Neuroscience*. 2017; 37(50):12106–12122. <https://doi.org/10.1523/jneurosci.0027-17.2017>, doi:  
674 10.1523/jneurosci.0027-17.2017.
- 675 House DRC, Elstrott J, Koh E, Chung J, Feldman DE. Parallel Regulation of Feedforward Inhibition and Excitation during Whisker  
676 Map Plasticity. *Neuron*. 2011; 72:819–831. doi: <https://doi.org/10.1016/j.neuron.2011.09.008>.
- 677 Huang YY, Colino A, Selig DK, Malenka RC. The influence of prior synaptic activity on the induction of long-term potentiation.  
678 *Science*. 1992; 255:730–733. doi: <https://doi.org/10.1126/science.1346729>.
- 679 Intrator N, Cooper LN. Objective function formulation of the BCM theory of visual cortical plasticity: Statistical connections,  
680 stability conditions. *Neural Networks*. 1992; 5:3–17. doi: [https://doi.org/10.1016/S0893-6080\(05\)80003-6](https://doi.org/10.1016/S0893-6080(05)80003-6).
- 681 Isaacson JS, Scanziani M. How Inhibition Shapes Cortical Activity. *Neuron*. 2011; 72(2):231–243. doi:  
682 <http://dx.doi.org/10.1016/j.neuron.2011.09.027>.
- 683 Kaleb K, Pedrosa V, Clopath C. Network-centered homeostasis through inhibition maintains hippocampal spatial map and cortical  
684 circuit function. *Cell Reports*. 2021; 36:109577. doi: <https://doi.org/10.1016/j.celrep.2021.109577>.
- 685 Keck T, Hübener M, Bonhoeffer T. Interactions between synaptic homeostatic mechanisms: an attempt to reconcile BCM the-  
686 ory, synaptic scaling, and changing excitation/inhibition balance. *Current Opinion in Neurobiology*. 2017; 43:87–93. doi:  
687 <https://doi.org/10.1016/j.conb.2017.02.003>.
- 688 Keck T, Scheuss V, Jacobsen RI, Wierenga CJ, Eysel UT, Bonhoeffer T, Hübener M. Loss of sensory input causes  
689 rapid structural changes of inhibitory neurons in adult mouse visual cortex. *Neuron*. 2011; 71:869–882. doi:  
690 <https://doi.org/10.1016/j.neuron.2011.06.034>.
- 691 Kirkwood A, Rioult MG, Bear MF. Experience-dependent modification of synaptic plasticity in visual cortex. *Nature*. 1996; 381:526–  
692 528. doi: <https://doi.org/10.1038/381526a0>.
- 693 Ko H, Cossell L, Baragli C, Antolik J, Clopath C, Hofer SB, Mrsic-Flogel TD. The emergence of functional microcircuits in visual  
694 cortex. *Nature*. 2013; 496:96–100. doi: <https://doi.org/10.1038/nature12015>.
- 695 Ko H, Hofer SB, Pichler B, Buchanan KA, Sjöström PJ, Mrsic-Flogel TD. Functional specificity of local synaptic connections in  
696 neocortical networks. *Nature*. 2011; 473:87–91. doi: <https://doi.org/10.1038/nature09880>.

- 697 Kripkee B, Froemke RC. Organization and Plasticity of Cortical Inhibition. *The Oxford Handbook of Developmental Neural Plas-*  
698 *ticity*; 2017. doi: [10.1093/oxfordhb/9780190635374.013.14](https://doi.org/10.1093/oxfordhb/9780190635374.013.14).
- 699 Kuhlman SJ, Olivas ND, Tring E, Ikrar T, Xu X, Trachtenberg JT. A disinhibitory microcircuit initiates critical-period plasticity in the  
700 visual cortex. *Nature*. 2013; 501:543–546. doi: <https://doi.org/10.1038/nature12485>.
- 701 Kuo MC, Dringenberg HC. Short-term (2 to 5 h) dark exposure lowers long-term potentiation (LTP) induction threshold in rat  
702 primary visual cortex. *Brain Research*. 2009; 1276:58–66. doi: <http://dx.doi.org/10.1016/j.brainres.2009.04.042>.
- 703 Lagzi F, Canto-Bustos M, Oswald AM, Doiron B. Assembly formation is stabilized by Parvalbumin neurons and accelerated by  
704 Somatostatin neurons. *bioRxiv*. 2021; doi: <https://doi.org/10.1101/2021.09.06.459211> ;
- 705 Lee WCA, Bonin V, Reed M, Graham BJ, Hood G, Glattfelder K, Reid RC. Anatomy and function of an excitatory network in the  
706 visual cortex. *Nature*. 2016; 532(7599):370–374. doi: <http://dx.doi.org/10.1038/nature17192>.
- 707 Letzkus JJ, Wolff SBE, Meyer EMM, Tovote P, Courtin J, Herry C, Lüthi A. A disinhibitory microcircuit for associative fear learning  
708 in the auditory cortex. *Nature*. 2011; 480(7377):331–335. doi: <https://doi.org/10.1038/nature10674>.
- 709 Letzkus JJ, Wolff SBE, Lüthi A. Disinhibition, a Circuit Mechanism for Associative Learning and Memory. *Neuron*. 2015; 88(2):264–  
710 276. doi: <https://doi.org/10.1016/j.neuron.2015.09.024>.
- 711 Li LY, Xiong XR, Ibrahim LA, Yuan W, Tao HW, Zhang LI. Differential Receptive Field Properties of Parvalbumin and Somatostatin In-  
712 hibitory Neurons in Mouse Auditory Cortex. *Cerebral Cortex*. 2015; 25:1782–1791. doi: <https://doi.org/10.1093/cercor/bht417>.
- 713 Li L, Gainey MA, Goldbeck JE, Feldman DE. Rapid homeostasis by disinhibition during whisker map plasticity. *Pro-*  
714 *ceedings of the National Academy of Sciences of the United States of America*. 2014; 111(4):1616–1621. doi:  
715 <http://doi.org/10.1073/pnas.1312455111>.
- 716 Litwin-Kumar A, Doiron B. Formation and maintenance of neuronal assemblies through synaptic plasticity. *Nature Communica-*  
717 *tions*. 2014; 5(5319). doi: <http://dx.doi.org/10.1038/ncomms6319>.
- 718 Lourenço J, Pacioni S, Rebola N, van Woerden GM, Marinelli S, DiGregorio D, Bacci A. Non-associative Potentiation of Periso-  
719 matic Inhibition Alters the Temporal Coding of Neocortical Layer 5 Pyramidal Neurons. *PLoS Biology*. 2014; 12(7):1–19. doi:  
720 [10.1371/journal.pbio.1001903](https://doi.org/10.1371/journal.pbio.1001903).
- 721 Luz Y, Shamir M. Balancing Feed-Forward Excitation and Inhibition via Hebbian Inhibitory Synaptic Plasticity. *PLoS Computational*  
722 *Biology*. 2012; 8(1):e1002334. doi: <https://doi.org/10.1371/journal.pcbi.1002334>.
- 723 Lynch GS, Dunwiddie T, Gribkoff V. Heterosynaptic depression: a postsynaptic correlate of long-term potentiation. *Nature*. 1977;  
724 266(21):737–739. doi: <https://doi.org/10.1038/266737a0>.
- 725 Ma WP, Liu BH, Li YT, Huang ZJ, Zhang LI, Tao HW. Visual representations by cortical somatostatin inhibitory neu-  
726 rons - Selective but with weak and delayed responses. *Journal of Neuroscience*. 2010; 30(43):14371–14379. doi:  
727 <https://doi.org/10.1523/JNEUROSCI.3248-10.2010>.
- 728 Maffei A, Lambo ME, Turrigiano GG. Critical period for inhibitory plasticity in rodent binocular V1. *Journal of Neuroscience*. 2010;  
729 30(9):3304–3309. doi: <https://doi.org/10.1523/JNEUROSCI.5340-09.2010>.
- 730 Maffei A, Nataraj K, Nelson SB, Turrigiano GG. Potentiation of cortical inhibition by visual deprivation. *Nature*. 2006; 443(7107):81–  
731 84. doi: <https://doi.org/10.1038/nature05079>.
- 732 Maffei A, Turrigiano GG. Multiple modes of network homeostasis in visual cortical layer 2/3. *Journal of Neuroscience*. 2008;  
733 28(17):4377–4384. doi: <https://doi.org/10.1523/JNEUROSCI.5298-07.2008>.
- 734 Mellor J. Synaptic Plasticity at Hippocampal Synapses: Experimental Background. In: *Hippocampal Microcircuits Springer Series in*  
735 *Computational Neuroscience*; 2018.p. 201–226. doi: [https://doi.org/10.1007/978-3-319-99103-0\\_{\ }6](https://doi.org/10.1007/978-3-319-99103-0_{\ }6).
- 736 Miller JEK, Ayzenshtat I, Carrillo-Reid L, Yuste R. Visual stimuli recruit intrinsically generated cortical ensembles. *Pro-*  
737 *ceedings of the National Academy of Sciences of the United States of America*. 2014; 111:E4053–E4061. doi:  
738 <https://doi.org/10.1073/pnas.1406077111>.
- 739 Miller KD, MacKay DJC. The Role of Constraints in Hebbian Learning. *Neural Computation*. 1994; 6:100–126. doi:  
740 <https://doi.org/10.1162/neco.1994.6.1.100>.
- 741 Miska NJ, Richter LMA, Cary BA, Gjorgjieva J, Turrigiano GG. Sensory experience inversely regulates feedforward and feedback  
742 excitation-inhibition ratio in rodent visual cortex. *eLife*. 2018; 7:e38846. doi: <https://doi.org/10.7554/eLife.38846.014>.

- 743 Montangie L, Miehl C, Gjorgjieva J. Autonomous emergence of connectivity assemblies via spike triplet interactions. *PLoS Computational Biology*. 2020; 16(5):e1007835. doi: <https://doi.org/10.1371/journal.pcbi.1007835>.
- 744
- 745 Naumann LB, Sprekeler H. Presynaptic inhibition rapidly stabilises recurrent excitation in the face of plasticity. *PLoS Computational Biology*. 2020; 16(8):e1008118. doi: <https://dx.doi.org/10.1371/journal.pcbi.1008118>.
- 746
- 747 Oja E. Simplified neuron model as a principal component analyzer. *Journal of Mathematical Biology*. 1982; 15(3):267–273. doi: <https://doi.org/10.1007/bf00275687>.
- 748
- 749 Paille V, Fino E, Du K, Morera-Herreras T, Perez S, Kotaleski JH, Venance L. GABAergic Circuits Control Spike-Timing-Dependent Plasticity. *Journal of Neuroscience*. 2013; 33(22):9353–9363. doi: <https://doi.org/10.1523/jneurosci.5796-12.2013>.
- 750
- 751 Pedrosa V, Clopath C. Voltage-based inhibitory synaptic plasticity: network regulation, diversity, and flexibility. *bioRxiv*. 2020; doi: <https://doi.org/10.1101/2020.12.08.416263>.
- 752
- 753 Philpot BD, Espinosa JS, Bear MF. Evidence for altered NMDA receptor function as a basis for metaplasticity in visual cortex. *Journal of Neuroscience*. 2003; 23(13):5583–5588. doi: <https://doi.org/10.1523/JNEUROSCI.23-13-05583.2003>.
- 754
- 755 Sanzeni A, Akitake B, Goldbach HC, Leedy CE, Brunel N, Histed MH. Inhibition stabilization is a widespread property of cortical networks. *eLife*. 2020; 9:e54875. doi: <https://doi.org/10.7554/eLife.54875>.
- 756
- 757 Schulz A, Miehl C, Berry II MJ, Gjorgjieva J. The generation of cortical novelty responses through inhibitory plasticity. *eLife*. 2021; 10:e65309. doi: <https://doi.org/10.7554/eLife.65309>.
- 758
- 759 Shew T, Yip S, Sastry BR. Mechanisms involved in tetanus-induced potentiation of fast IPSCs in rat hippocampal CA1 neurons. *Journal of Neurophysiology*. 2000; 83(6):3388–3401. doi: <https://doi.org/10.1152/jn.2000.83.6.3388>.
- 760
- 761 Sprekeler H. Functional consequences of inhibitory plasticity: homeostasis, the excitation-inhibition balance and beyond. *Current Opinion in Neurobiology*. 2017; 43:198–203. doi: [http://dx.doi.org/10.1016/j.conb.2017.03.014](https://dx.doi.org/10.1016/j.conb.2017.03.014), doi: 10.1016/j.conb.2017.03.014.
- 762
- 763
- 764 Steele PM, Mauk MD. Inhibitory Control of LTP and LTD: Stability of Synapse Strength. *Journal of Neurophysiology*. 1999; 81:1559–1566.
- 765
- 766 Thompson A, Gribizis A, Chen C, Crair MC. Activity-dependent development of visual receptive fields. *Current Opinion in Neurobiology*. 2017; 42:136–143. doi: <http://dx.doi.org/10.1016/j.conb.2016.12.007>.
- 767
- 768 Tremblay R, Lee S, Rudy B. GABAergic Interneurons in the Neocortex: From Cellular Properties to Circuits. *Neuron*. 2016; 91(2):260–292. doi: <https://doi.org/10.1016/j.neuron.2016.06.033>.
- 769
- 770 Tsodyks M, Skaggs WE, Sejnowski TJ, McNaughton BL. Paradoxical Effects of External Modulation of Inhibitory Interneurons. *The Journal of Neuroscience*. 1997; 17(11):4382–4388. doi: <https://doi.org/10.1523/JNEUROSCI.17-11-04382.1997>.
- 771
- 772 Turrigiano GG. The Self-Tuning Neuron: Synaptic Scaling of Excitatory Synapses. *Cell*. 2008; 135:422–435. doi: <http://dx.doi.org/10.1016/j.cell.2008.10.008>.
- 773
- 774 Turrigiano GG. Too Many Cooks? Intrinsic and Synaptic Homeostatic Mechanisms in Cortical Circuit Refinement. *Annual Review of Neuroscience*. 2011 7; 34:89–103. doi: <https://doi.org/10.1146/annurev-neuro-060909-153238>.
- 775
- 776 Turrigiano GG. The dialectic of hebb and homeostasis. *Philosophical Transactions of the Royal Society B: Biological Sciences*. 2017; 372:20160258. doi: <https://doi.org/10.1098/rstb.2016.0258>.
- 777
- 778 Turrigiano GG, Leslie KR, Desai NS, Rutherford LC, Nelson SB. Activity-dependent scaling of quantal amplitude in neocortical neurons. *Nature*. 1998 2; 391(6670):892–896. doi: <https://doi.org/10.1038/36103>.
- 779
- 780 Turrigiano GG, Nelson SB. Homeostatic plasticity in the developing nervous system. *Nature Reviews Neuroscience*. 2004; 5:97–107. doi: <https://doi.org/10.1038/nrn1327>.
- 781
- 782 Udakis M, Pedrosa V, Chamberlain SEL, Clopath C, Mellor JR. Interneuron-specific plasticity at parvalbumin and somatostatin inhibitory synapses onto CA1 pyramidal neurons shapes hippocampal output. *Nature Communications*. 2020; 11(4395). doi: <https://doi.org/10.1038/s41467-020-18074-8>.
- 783
- 784
- 785 van Versendaal D, Rajendran R, Saiepour HM, Klooster J, Smit-Rigter L, Sommeijer JP, De Zeeuw CI, Hofer SB, Heimel AJ, Levelt CN. Elimination of Inhibitory Synapses Is a Major Component of Adult Ocular Dominance Plasticity. *Neuron*. 2012; 74:374–383. doi: <https://doi.org/10.1016/j.neuron.2012.03.015>.
- 786
- 787



- 788 Vickers ED, Clark C, Osypenko D, Fratzl A, Kochubey O, Bettler B, Schneggenburger R. Parvalbumin-Interneuron Output Synapses  
789 Show Spike-Timing-Dependent Plasticity that Contributes to Auditory Map Remodeling. *Neuron*. 2018; 99:720–735. doi:  
790 <https://doi.org/10.1016/j.neuron.2018.07.018>.
- 791 Vogels TP, Froemke RC, Doyon N, Gilson M, Haas JS, Liu R, Maffei A, Miller P, Wierenga CJ, Woodin MA, Zenke F, Sprekeler H.  
792 Inhibitory synaptic plasticity: spike timing-dependence and putative network function. *Frontiers in Neural Circuits*. 2013; 7.  
793 doi: <https://doi.org/10.3389/fncir.2013.00119>.
- 794 Vogels TP, Sprekeler H, Zenke F, Clopath C, Gerstner W. Inhibitory Plasticity Balances Excitation and Inhibition in Sensory Pathways  
795 and Memory Networks. *Science*. 2011; 334(6062):1569–1573. doi: <https://doi.org/10.1126/science.1211095>.
- 796 Wang L, Maffei A. Inhibitory Plasticity Dictates the Sign of Plasticity at Excitatory Synapses. *Journal of Neuroscience*. 2014;  
797 34(4):1083–1093. doi: <https://doi.org/10.1523/jneurosci.4711-13.2014>.
- 798 Wang XJ, Yang GR. A disinhibitory circuit motif and flexible information routing in the brain. *Current Opinion in Neurobiology*.  
799 2018; 49:75–83. doi: <http://dx.doi.org/10.1016/j.conb.2018.01.002>.
- 800 Williams LE, Holtmaat A. Higher-Order Thalamocortical Inputs Gate Synaptic Long-Term Potentiation via Disinhibition. *Neuron*.  
801 2019; 101:91–102. doi: <https://doi.org/10.1016/j.neuron.2018.10.049>.
- 802 Woodin MA, Ganguly K, Poo MM. Coincident Pre- and Postsynaptic Activity Modifies GABAergic Synapses by Postsynaptic Changes  
803 in Cl<sup>-</sup> Transporter Activity. *Neuron*. 2003; 39(5):807–820. doi: [https://doi.org/10.1016/s0896-6273\(03\)00507-5](https://doi.org/10.1016/s0896-6273(03)00507-5).
- 804 Wu YK, Hengen KB, Turrigiano GG, Gjorgjieva J. Homeostatic mechanisms regulate distinct aspects of cortical circuit dynamics.  
805 *Proceedings of the National Academy of Sciences*. 2020; 117(39):24514–24525. doi: <https://doi.org/10.1073/pnas.1918368117>.
- 806 Xue M, Atallah BV, Scanziani M. Equalizing excitation-inhibition ratios across visual cortical neurons. *Nature*. 2014; 511:596–600.  
807 doi: <https://doi.org/10.1038/nature13321>.
- 808 Yee AX, Hsu YT, Chen L. A metaplasticity view of the interaction between homeostatic and hebbian plasticity. *Philosophical  
809 Transactions of the Royal Society B*. 2017; 372:20160155. doi: <https://doi.org/10.1098/rstb.2016.0155>.
- 810 Yger P, Gilson M. Models of Metaplasticity: A Review of Concepts. *Frontiers in Computational Neuroscience*. 2015; 9. doi:  
811 <https://doi.org/10.3389/fncom.2015.00138>.
- 812 Zenke F, Gerstner W. Hebbian plasticity requires compensatory processes on multiple timescales. *Philosophical Transactions of  
813 the Royal Society B: Biological Sciences*. 2017; 372(1715):20160259. doi: <http://dx.doi.org/10.1098/rstb.2016.0259>.
- 814 Zenke F, Gerstner W, Ganguli S. The temporal paradox of Hebbian learning and homeostatic plasticity. *Current Opinion in  
815 Neurobiology*. 2017; 43:166–176. doi: <http://dx.doi.org/10.1016/j.conb.2017.03.015>.
- 816 Zenke F, Hennequin G, Gerstner W. Synaptic Plasticity in Neural Networks Needs Homeostasis with a Fast Rate Detector. *PLoS  
817 Computational Biology*. 2013; 9(11):e1003330. doi: <https://doi.org/10.1371/journal.pcbi.1003330>.
